# Supplementary material
Source: PubMed Central journal article supplement (PMC2562661)

## Legend for Supplemental Material

### Supplemental Figure 1. Tandem mass spectrometry analysis of the major *H. capsulatum* phospholipid

**species. (A-E)** Negative-ion mode MS/MS spectra of the ion species at  $m/z$  714.6, 716.6, 740.6, 742.6, and 774.5, respectively. **(F-Q)** Positive-ion mode MS/MS spectra of the ion species at  $m/z$  746.7, 760.7, 762.7, 764.7, 766.7, 780.7, 782.7, 786.7, 790.7, 804.7, 806.7, and 808.7, respectively. The assignments for the fragment-ion species are indicated. C16:0, C18:0, C18:1, C18:2, and C20:4, carboxylate ions of palmitic acid, stearic acid, oleic acid, linoleic acid, and arachidonic acid (or their isomers), respectively; Cho, choline; ChoP, phosphocholine; EtN, ethanolamine; EtNP, ethanolaminephosphate; EtNP<sub>c</sub>, cyclic ethanolaminephosphate; EtP, ethylenephosphate; GroEtNP, glycerol ethanolaminephosphate; Me, methyl group; Me<sub>3</sub>N, trimethylamine;  $m/z$ , mass to charge ratio; PC, phosphatidylcholine; PE, phosphatidylethanolamine; PS, phosphatidylserine; Ser, serine; SerP, serinephosphate.

Supplemental Figure 1A

**ESI-**  
***m/z* 714.6**  
**C16:0/C18:2-PE**

2: TOF MSMS 714.41ES-  
178

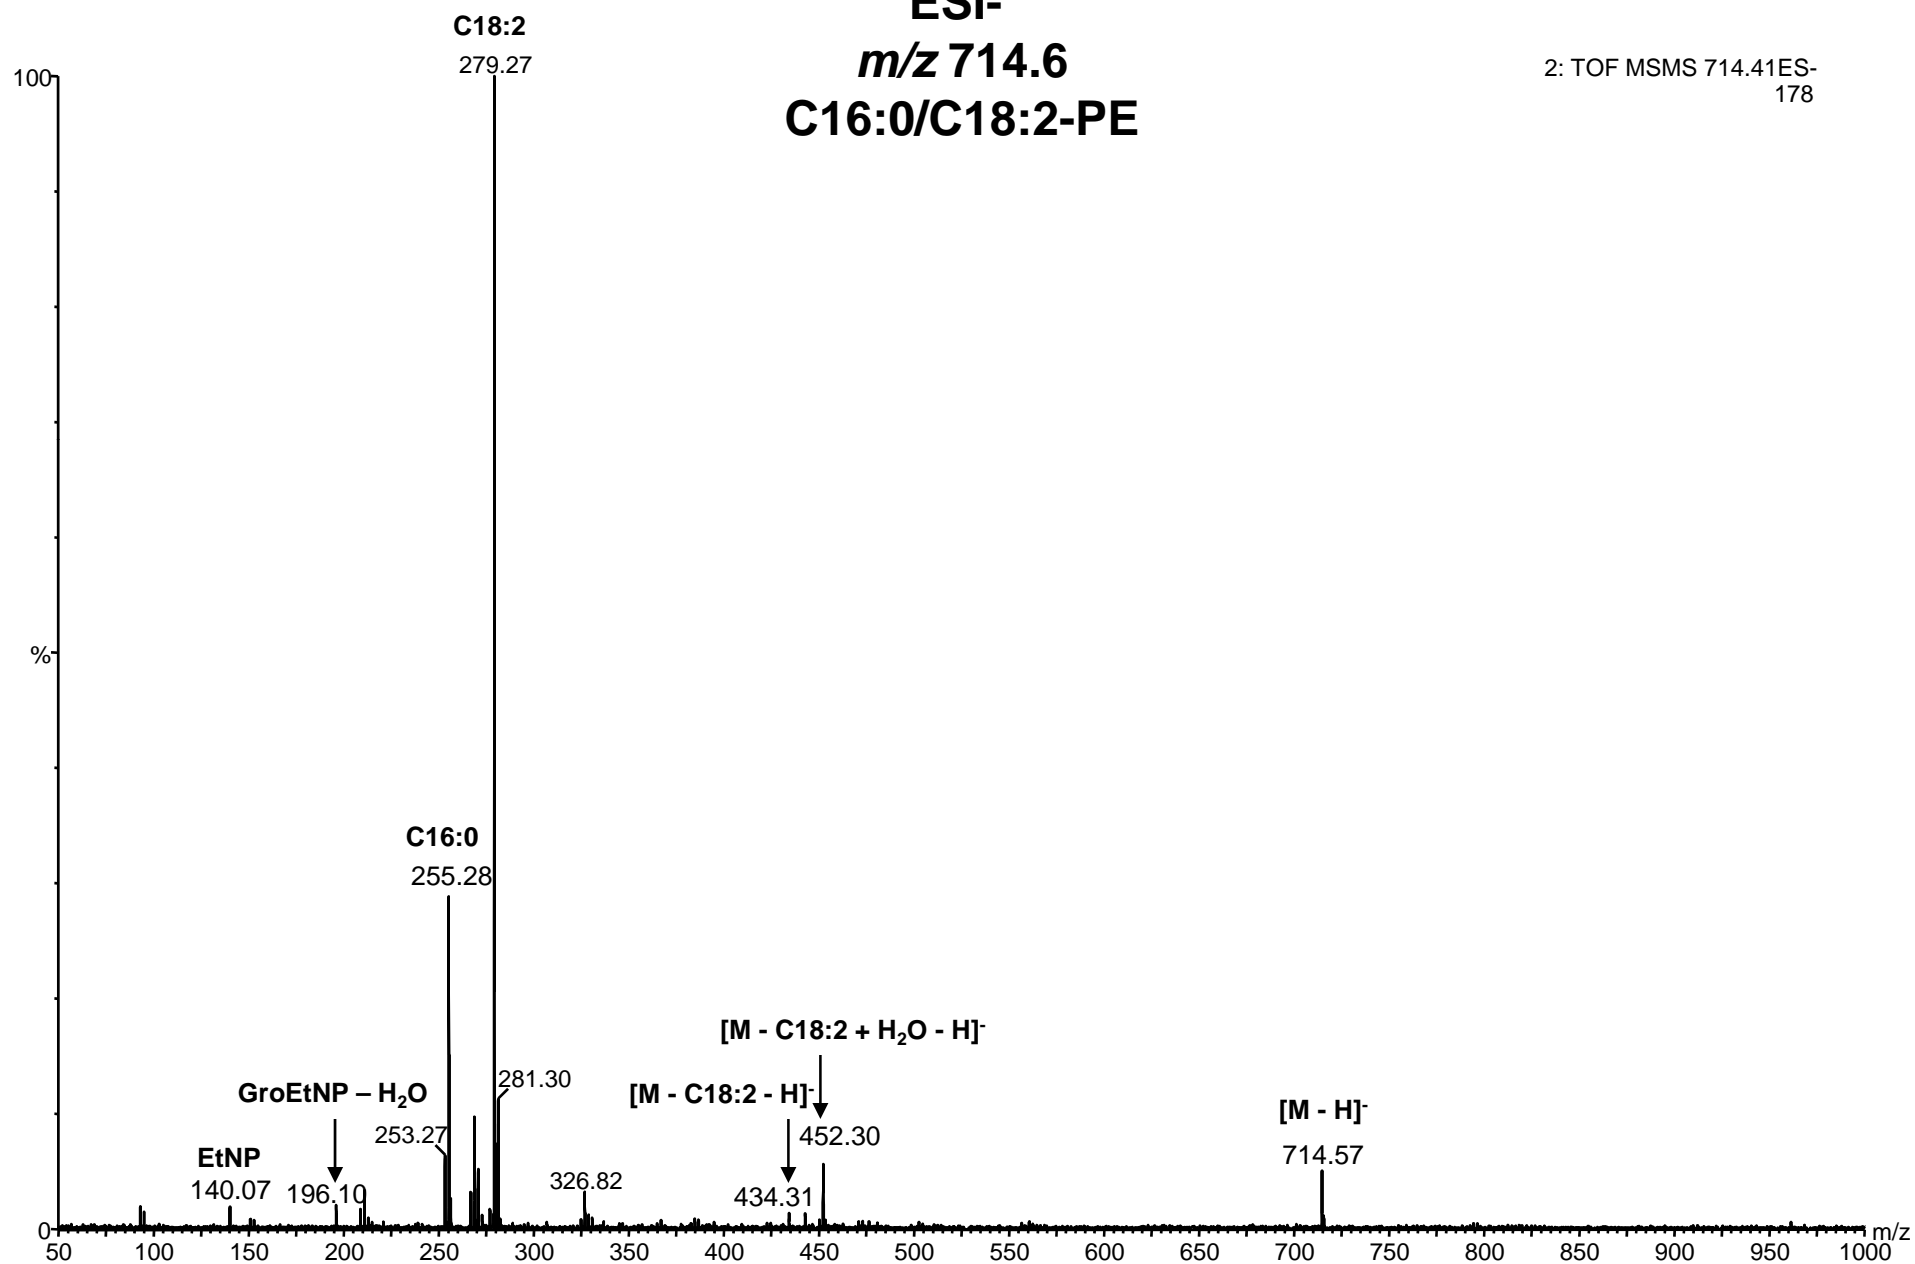

# Supplemental Figure 1B

## ESI- *m/z* 716.6 C16:0/C18:1-PE

TOF MSMS 716.55ES-  
170

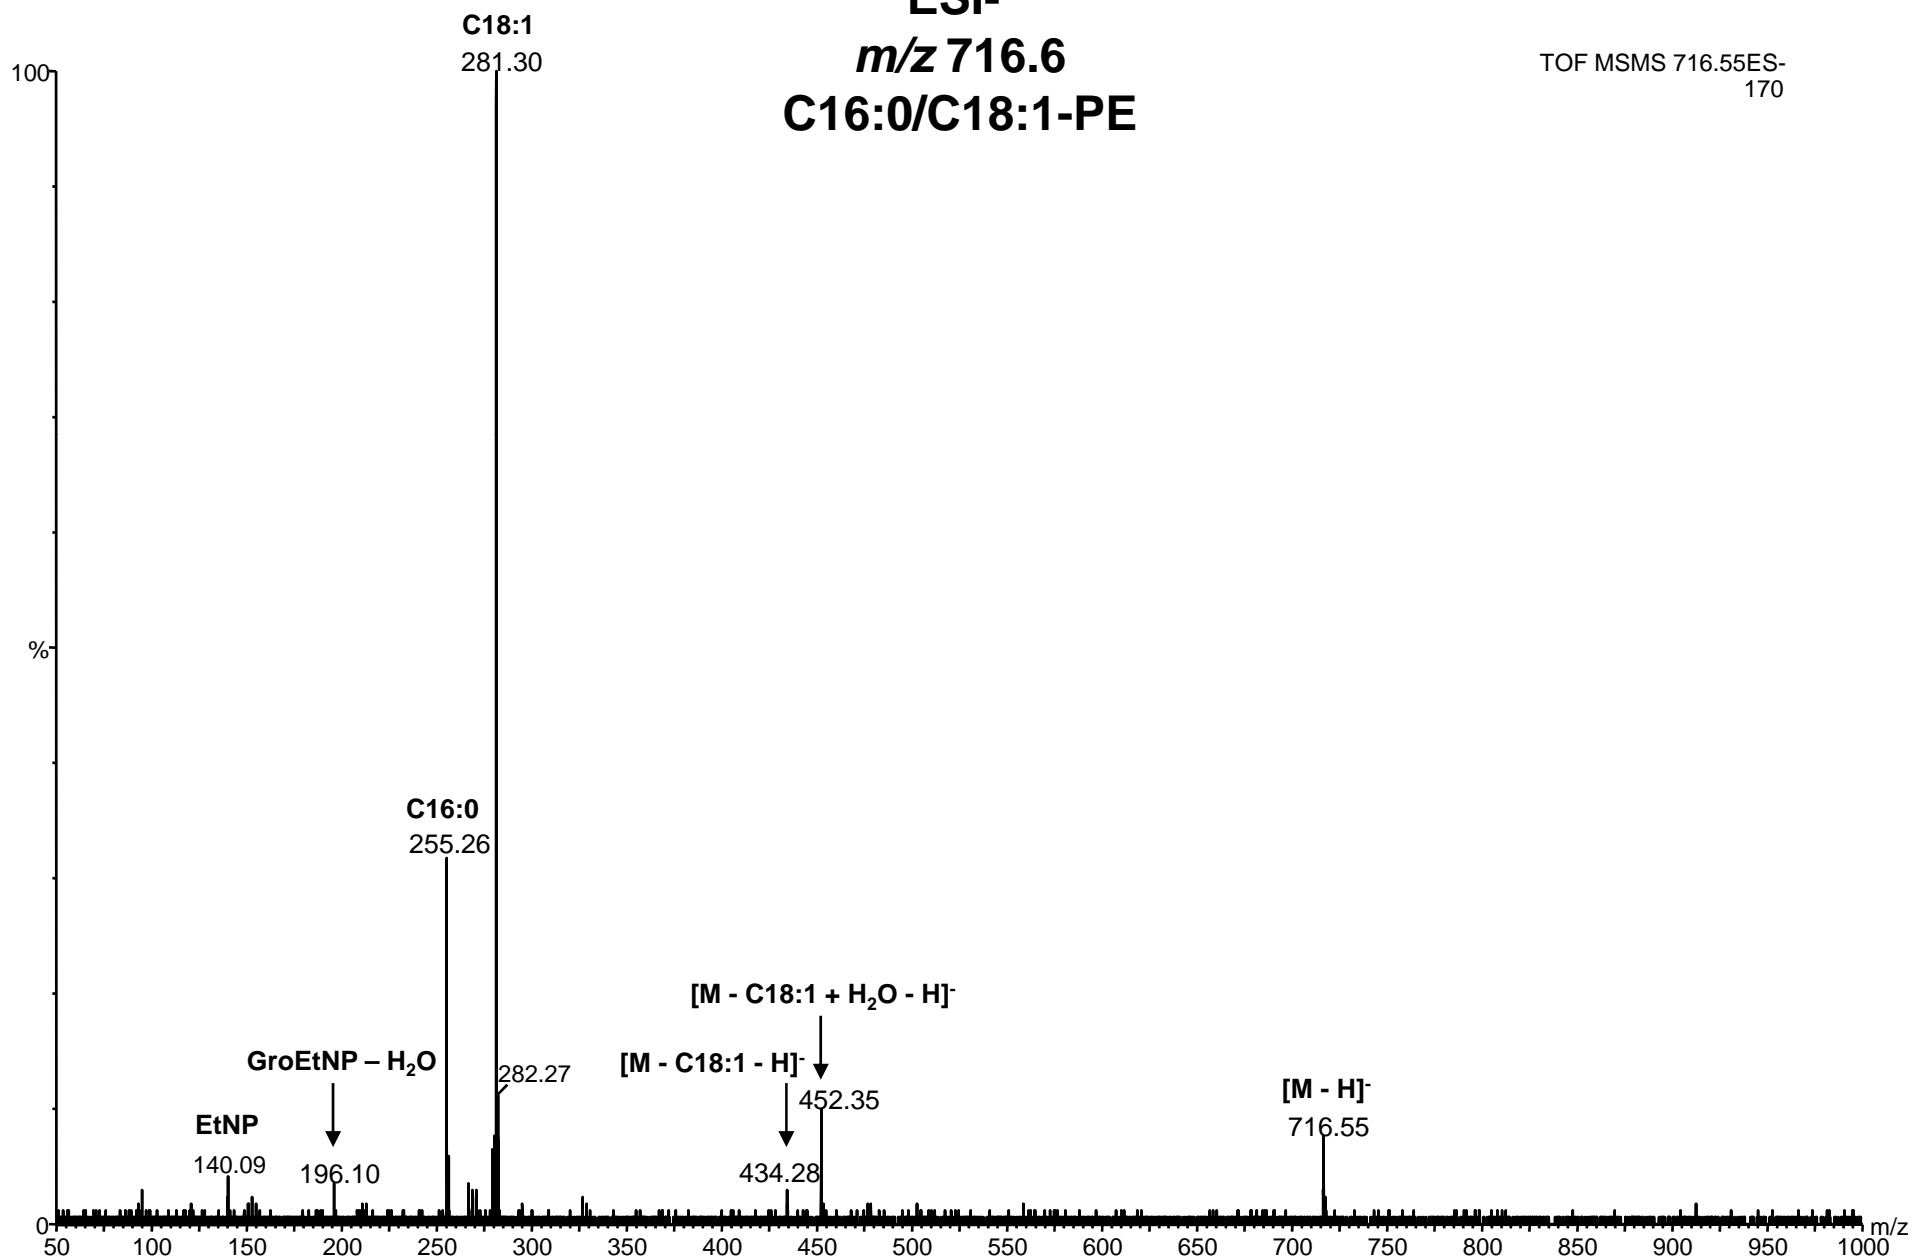

Supplemental Figure 1C

**ESI-**  
***m/z* 740.6**  
**C18:2/C18:1-PE**

2: TOF MSMS 740.55ES-  
88.2

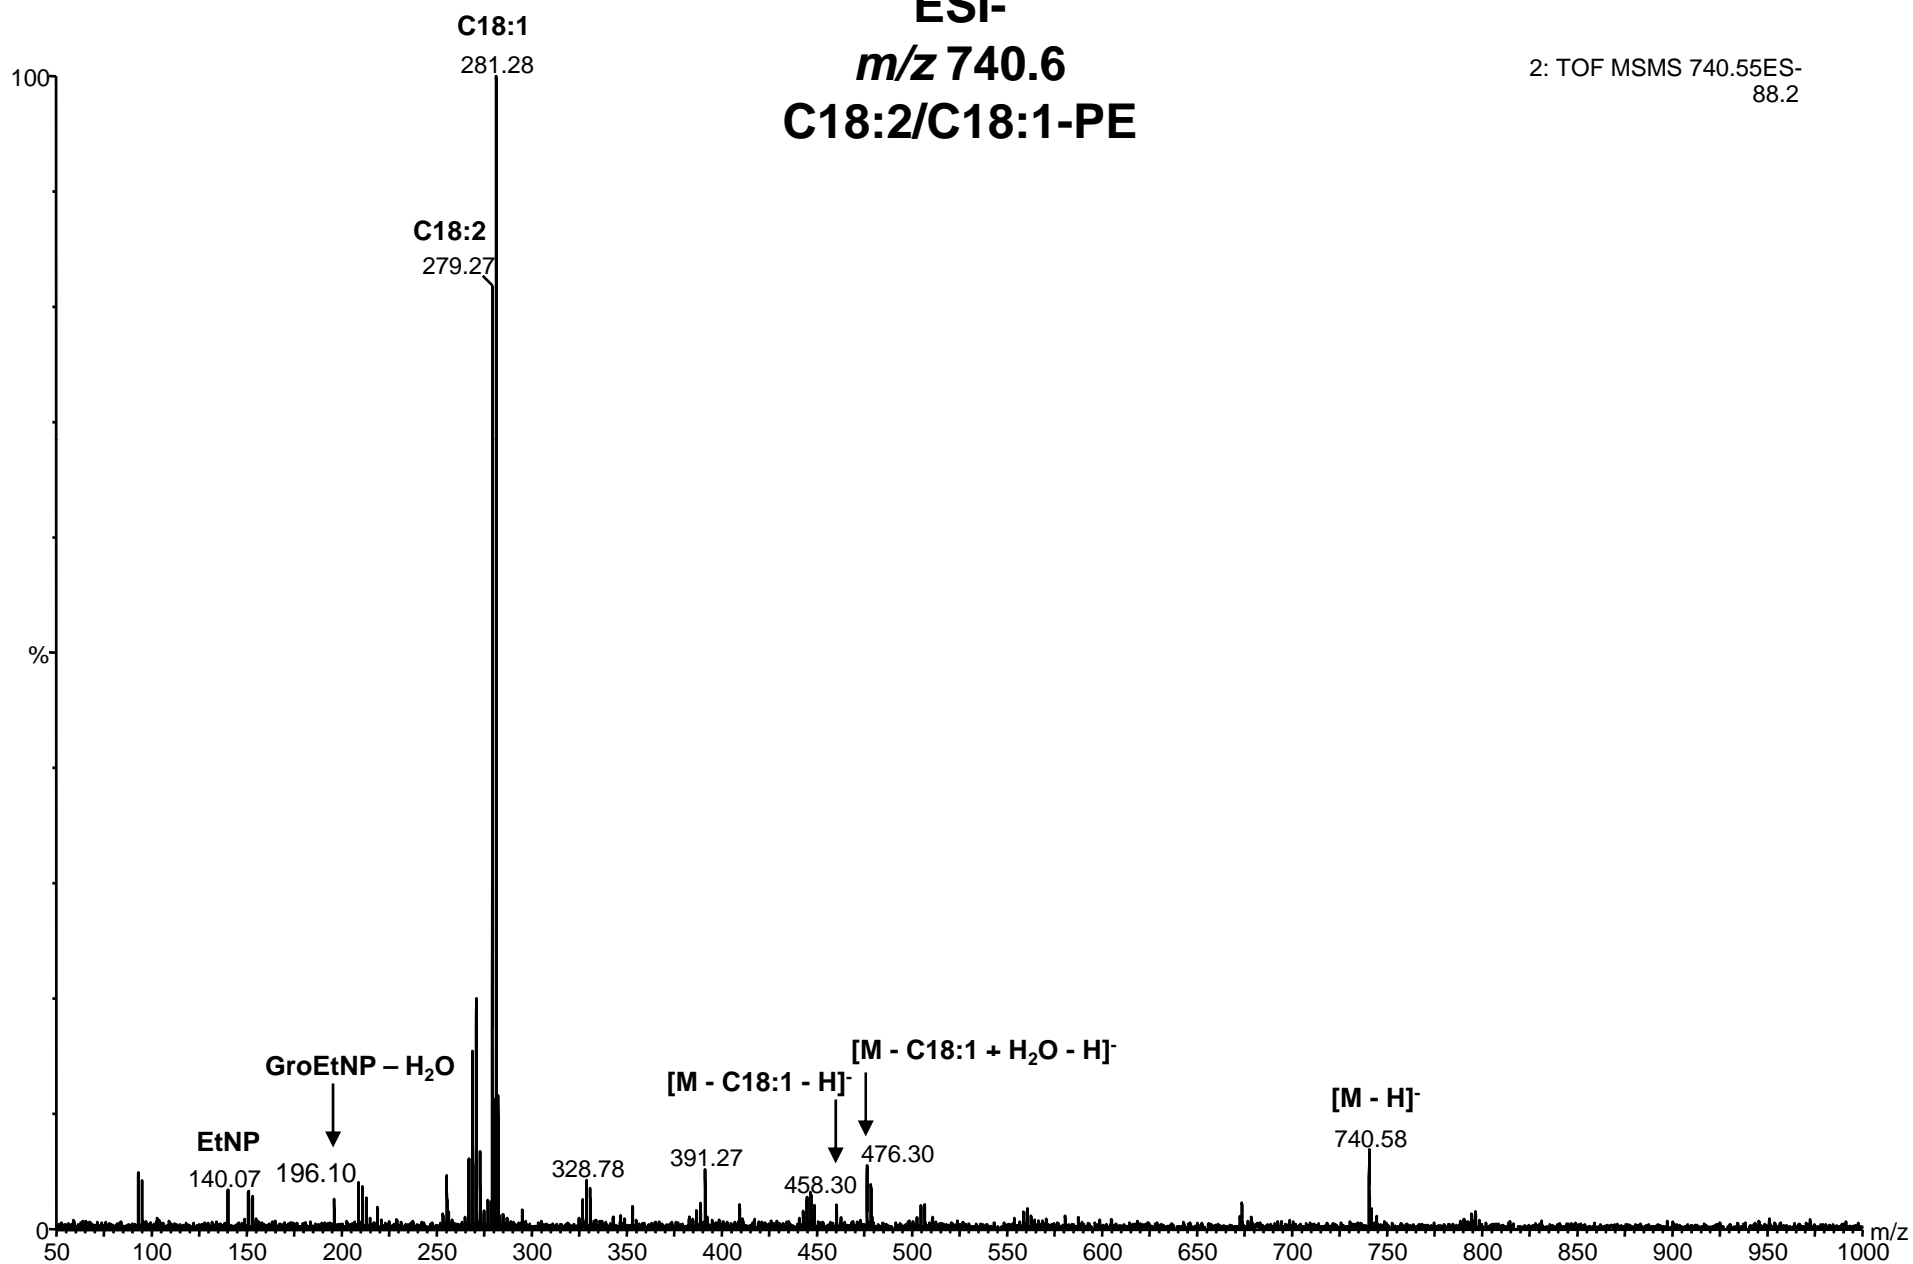

# Supplemental Figure 1D

**ESI-**  
***m/z* 742.6**  
**C18:1/C18:1-PE**

2: TOF MSMS 742.63ES-  
148

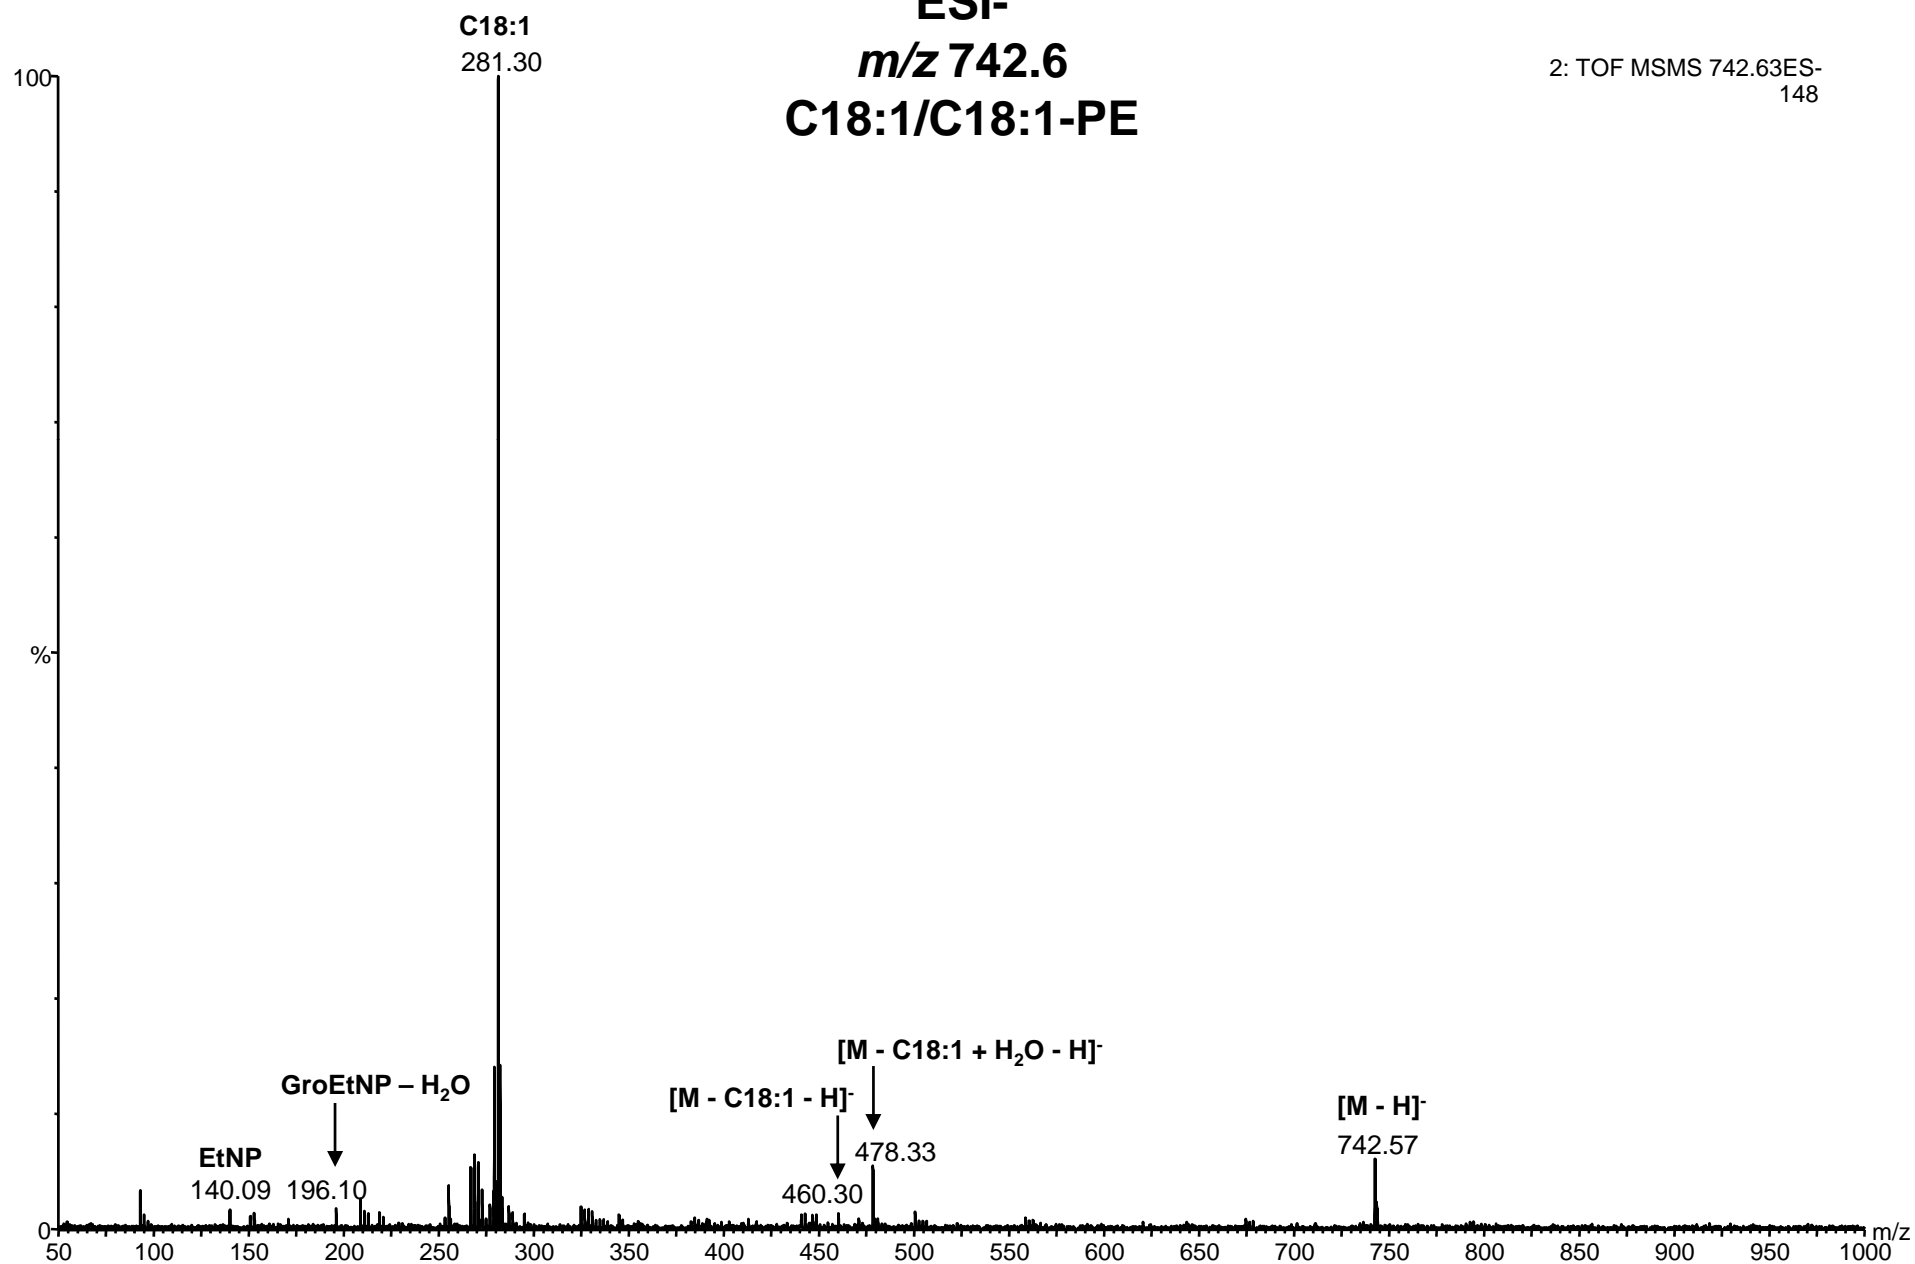

Supplemental Figure 1E

**ESI-**  
***m/z* 774.5**  
**C16:0/C18:1-PE + NaCl**

2: TOF MSMS 774.44ES-  
68.6

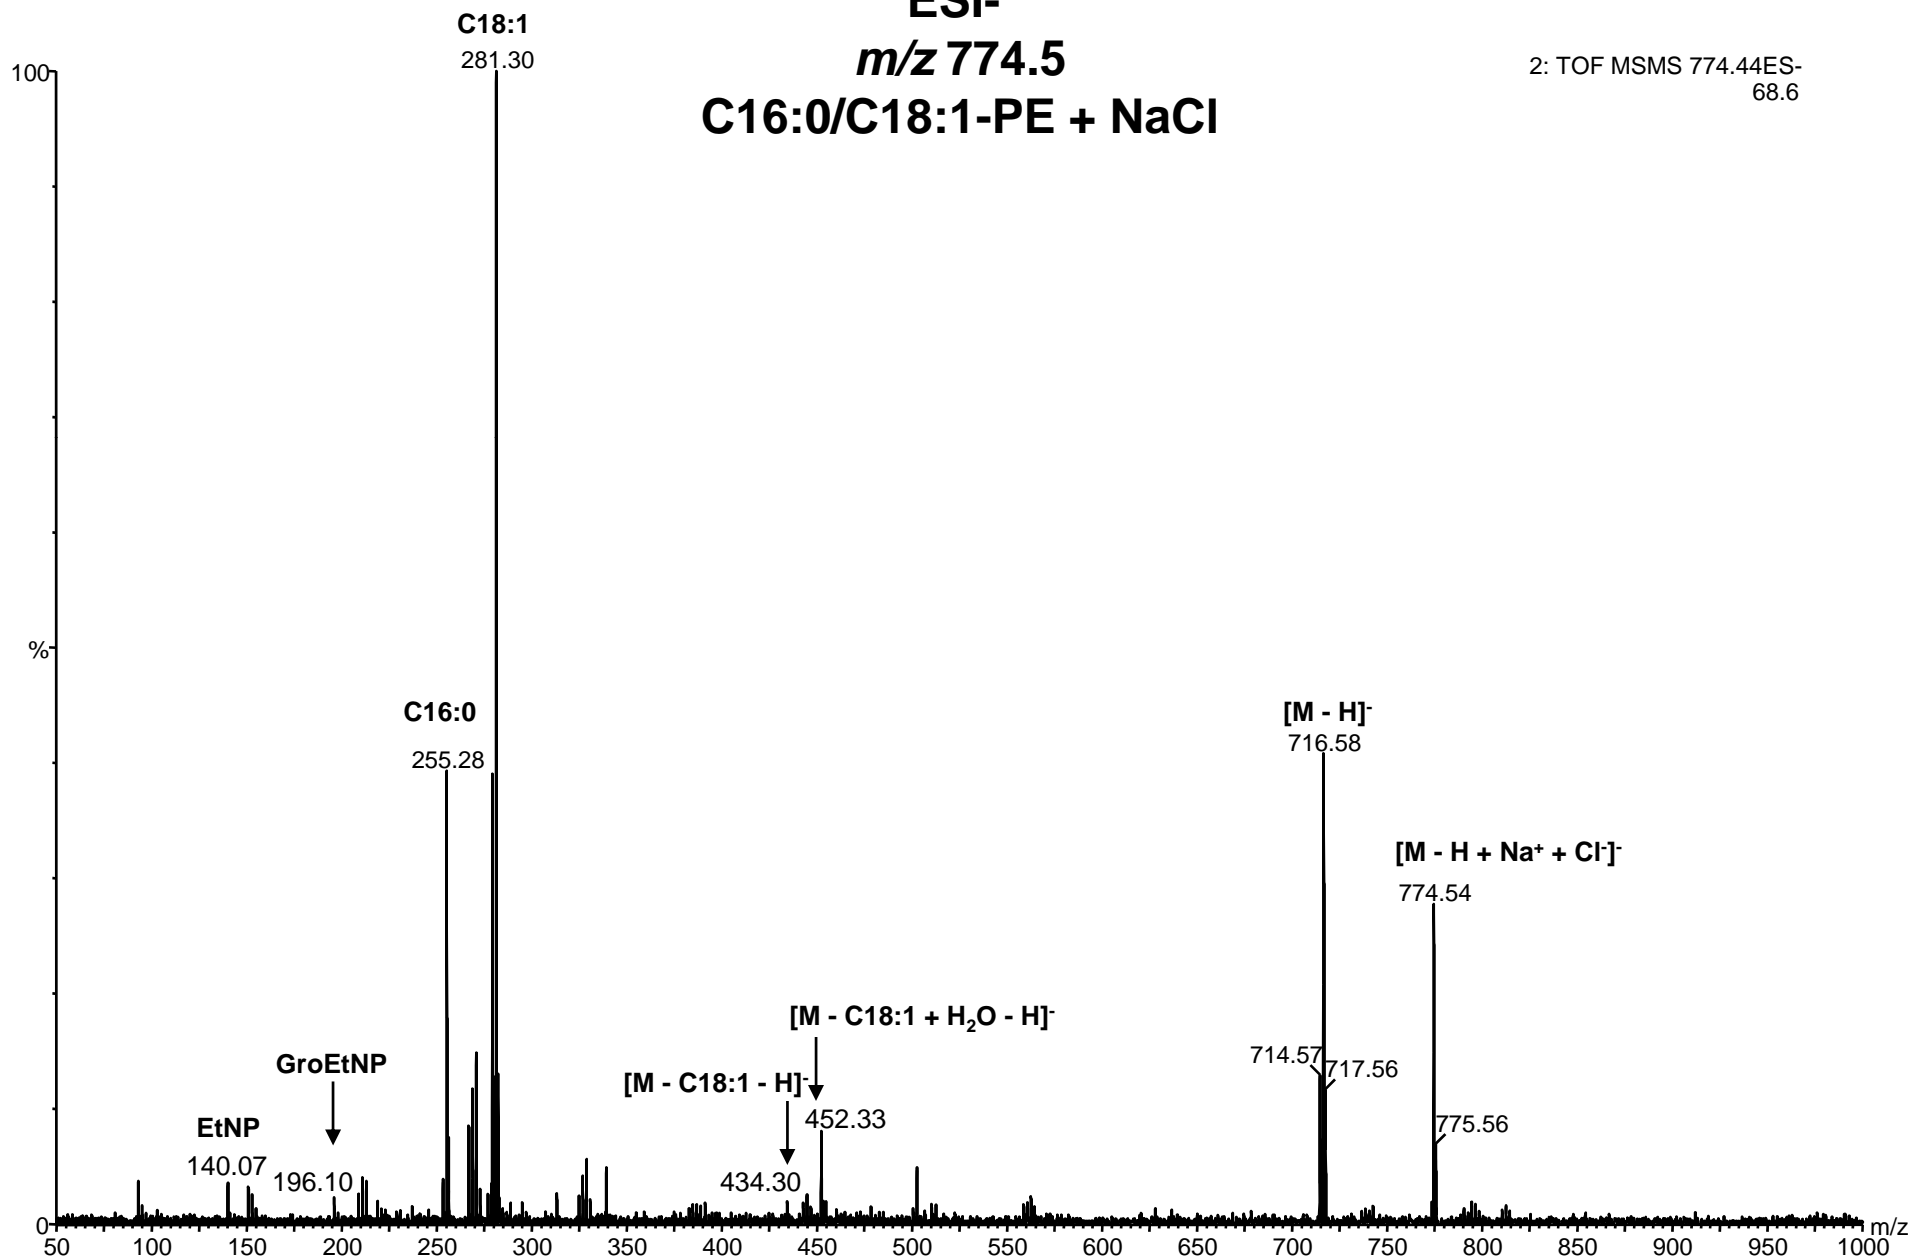

# Supplemental Figure 1F

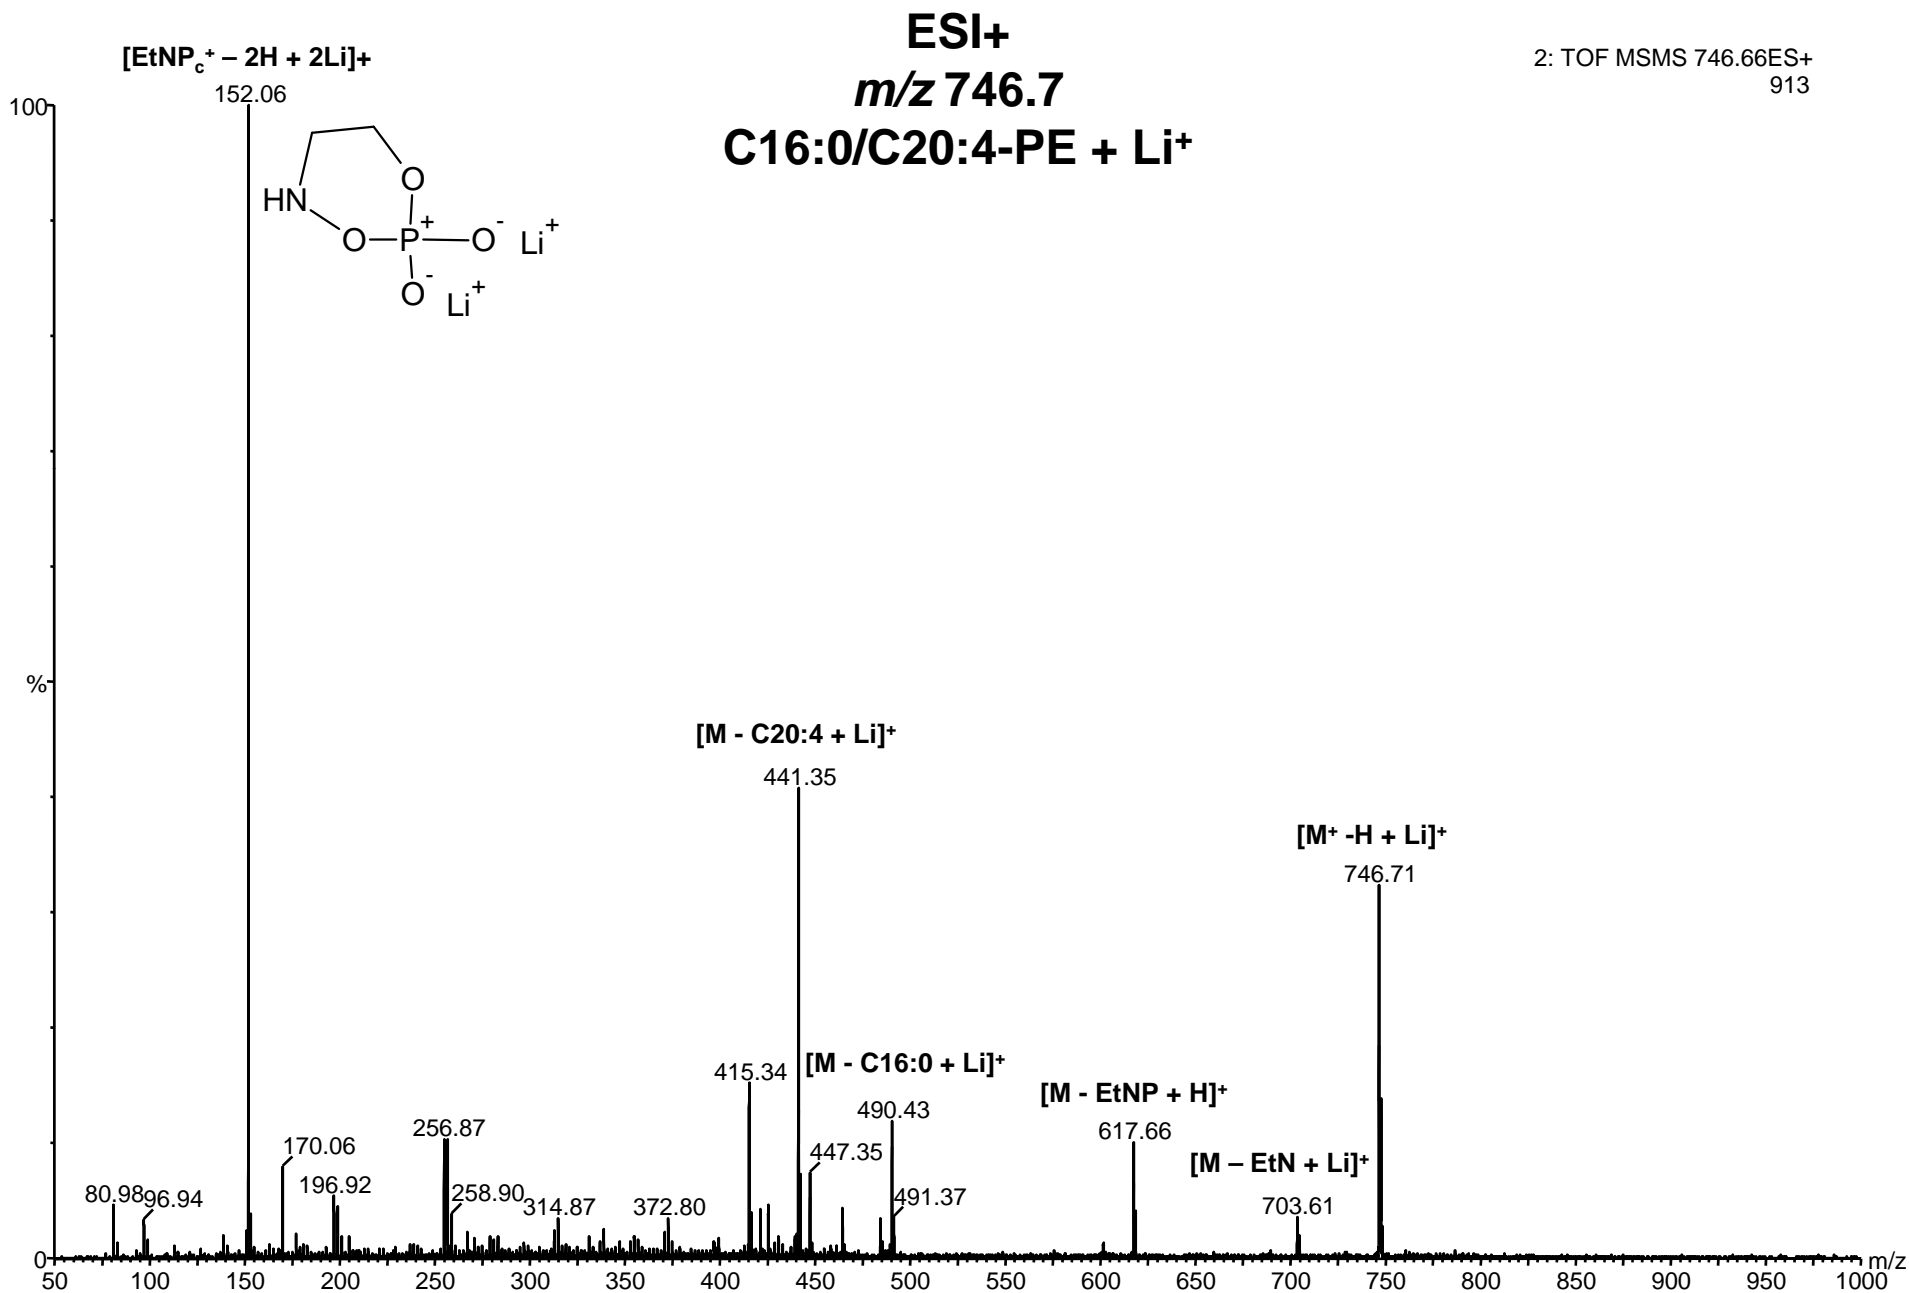

Supplemental Figure 1G

**ESI+**  
***m/z* 760.7**  
**C16:0/C18:2-PS**

2: TOF MSMS 760.69ES+  
403

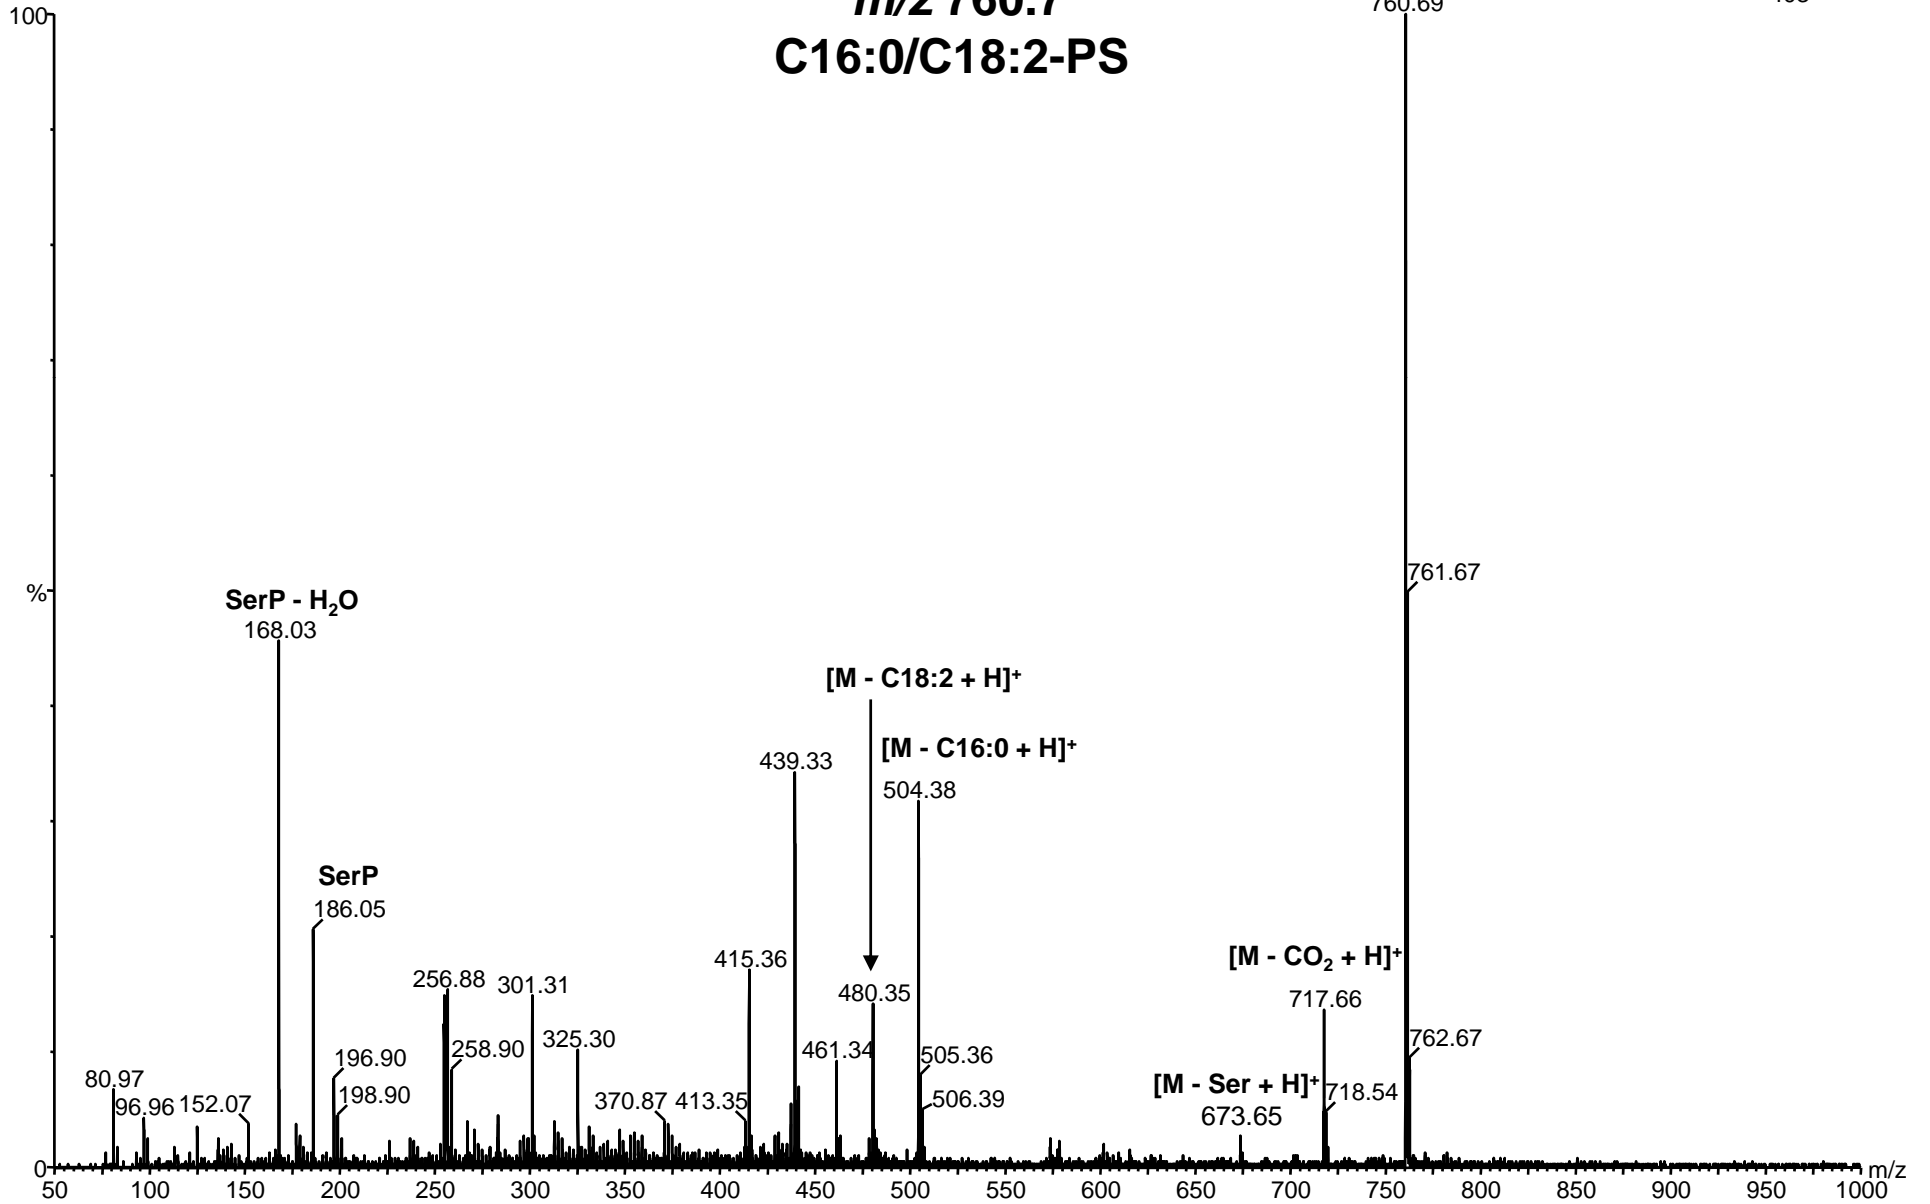



# Supplemental Figure 1H

**ESI+**  
***m/z* 762.7**  
**C16:0/C18:1-PS**

2: TOF MSMS 762.74ES+  
554

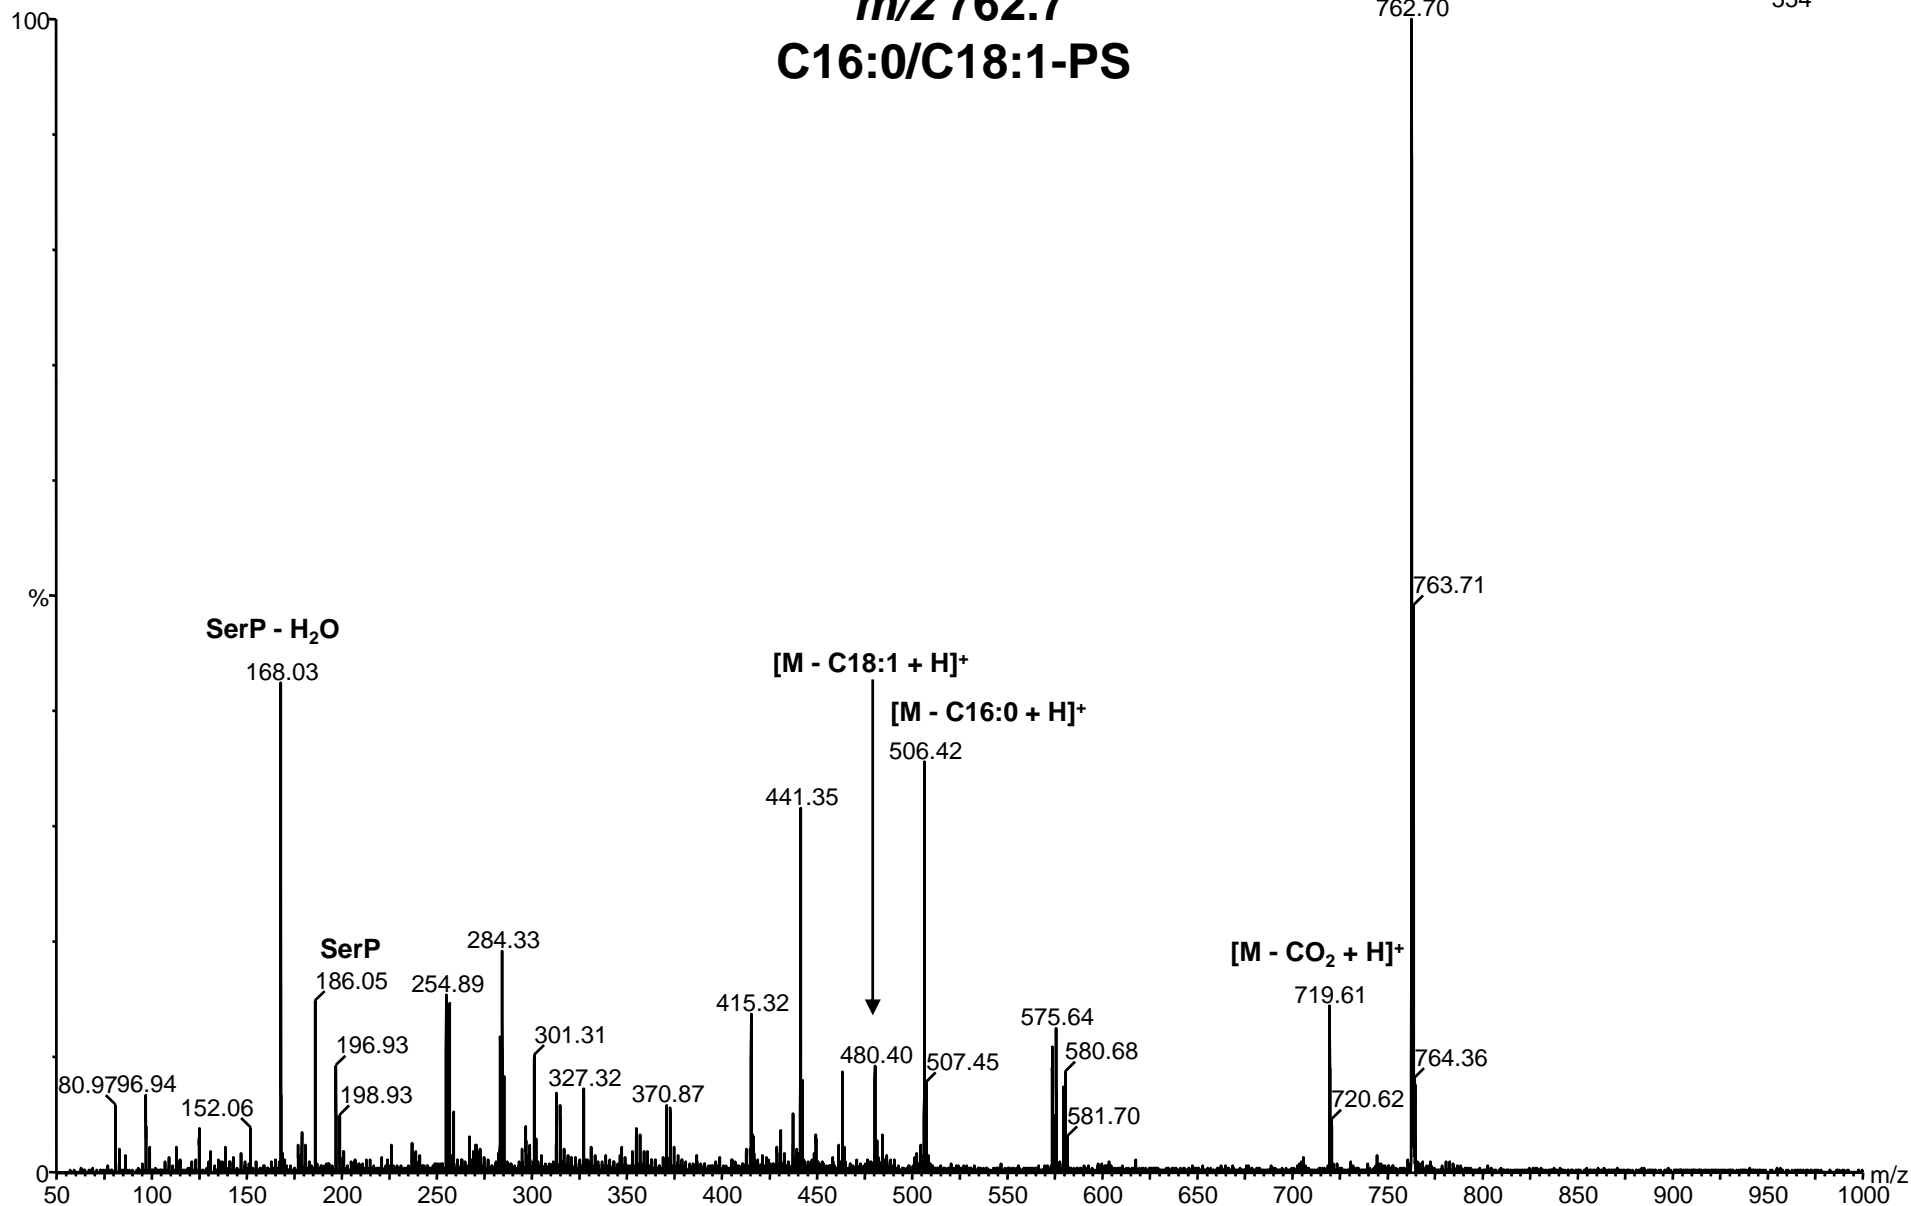

Supplemental Figure 1I

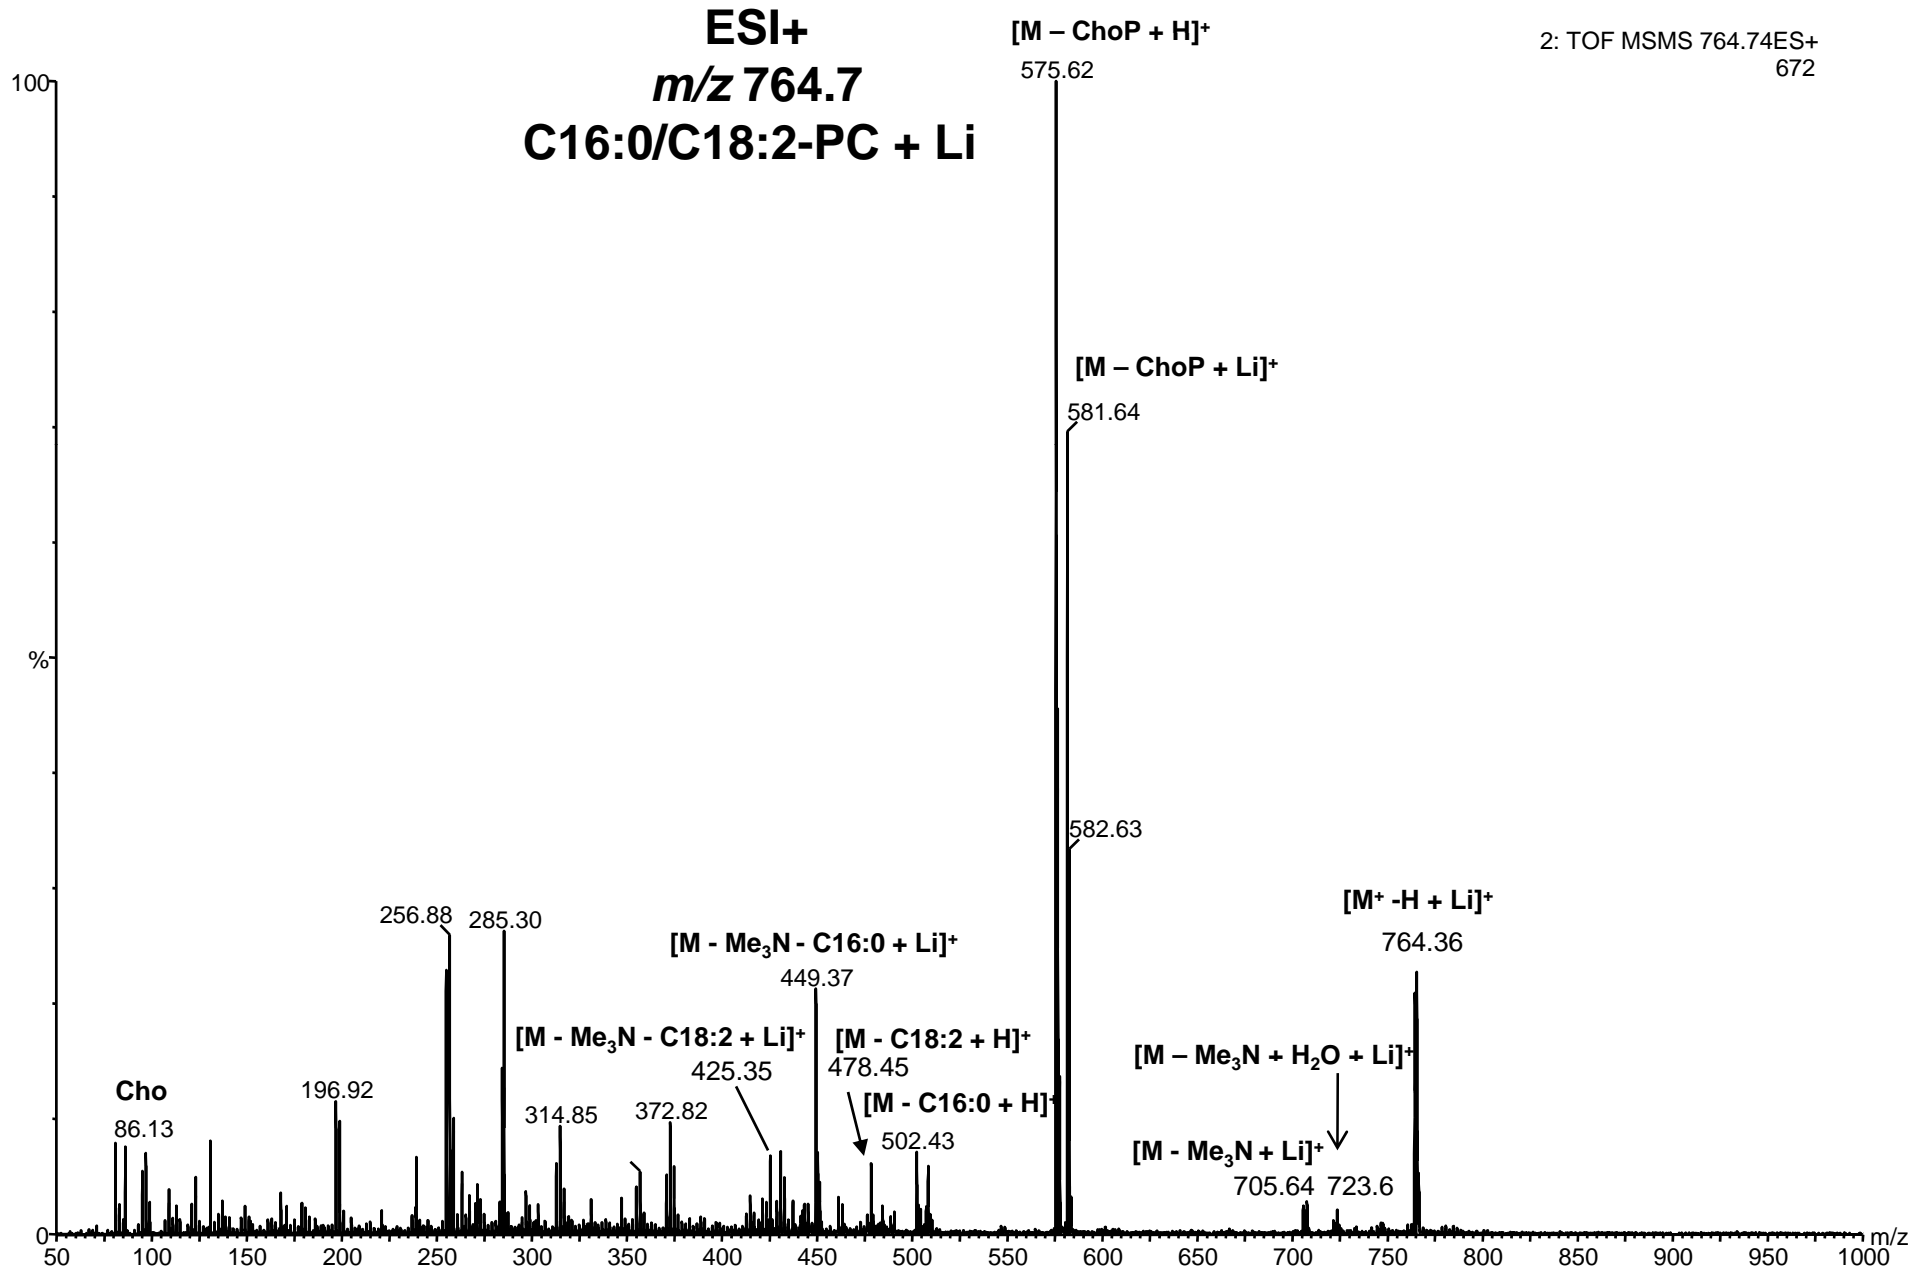

Supplemental Figure 1J

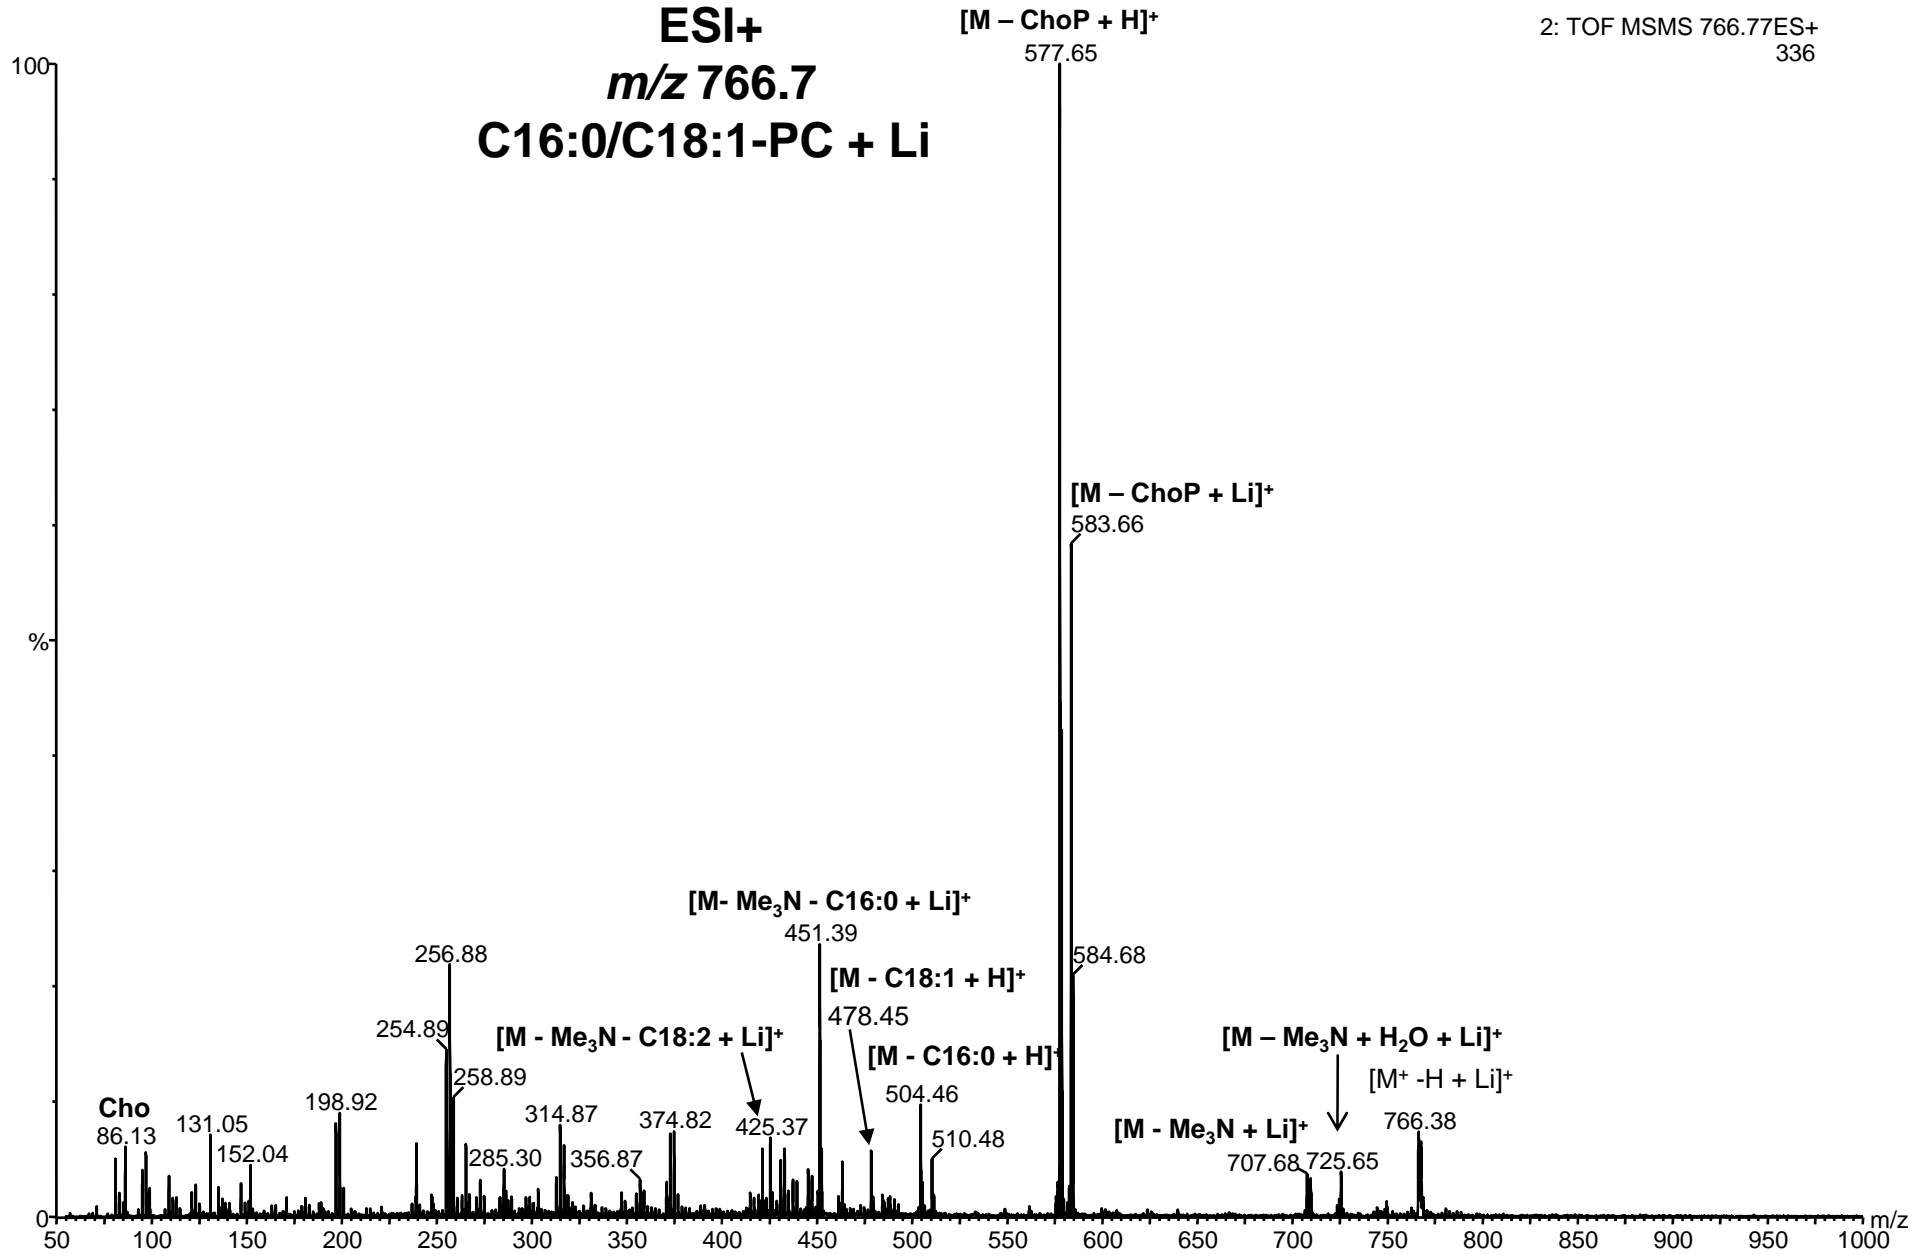

Supplemental Figure 1K

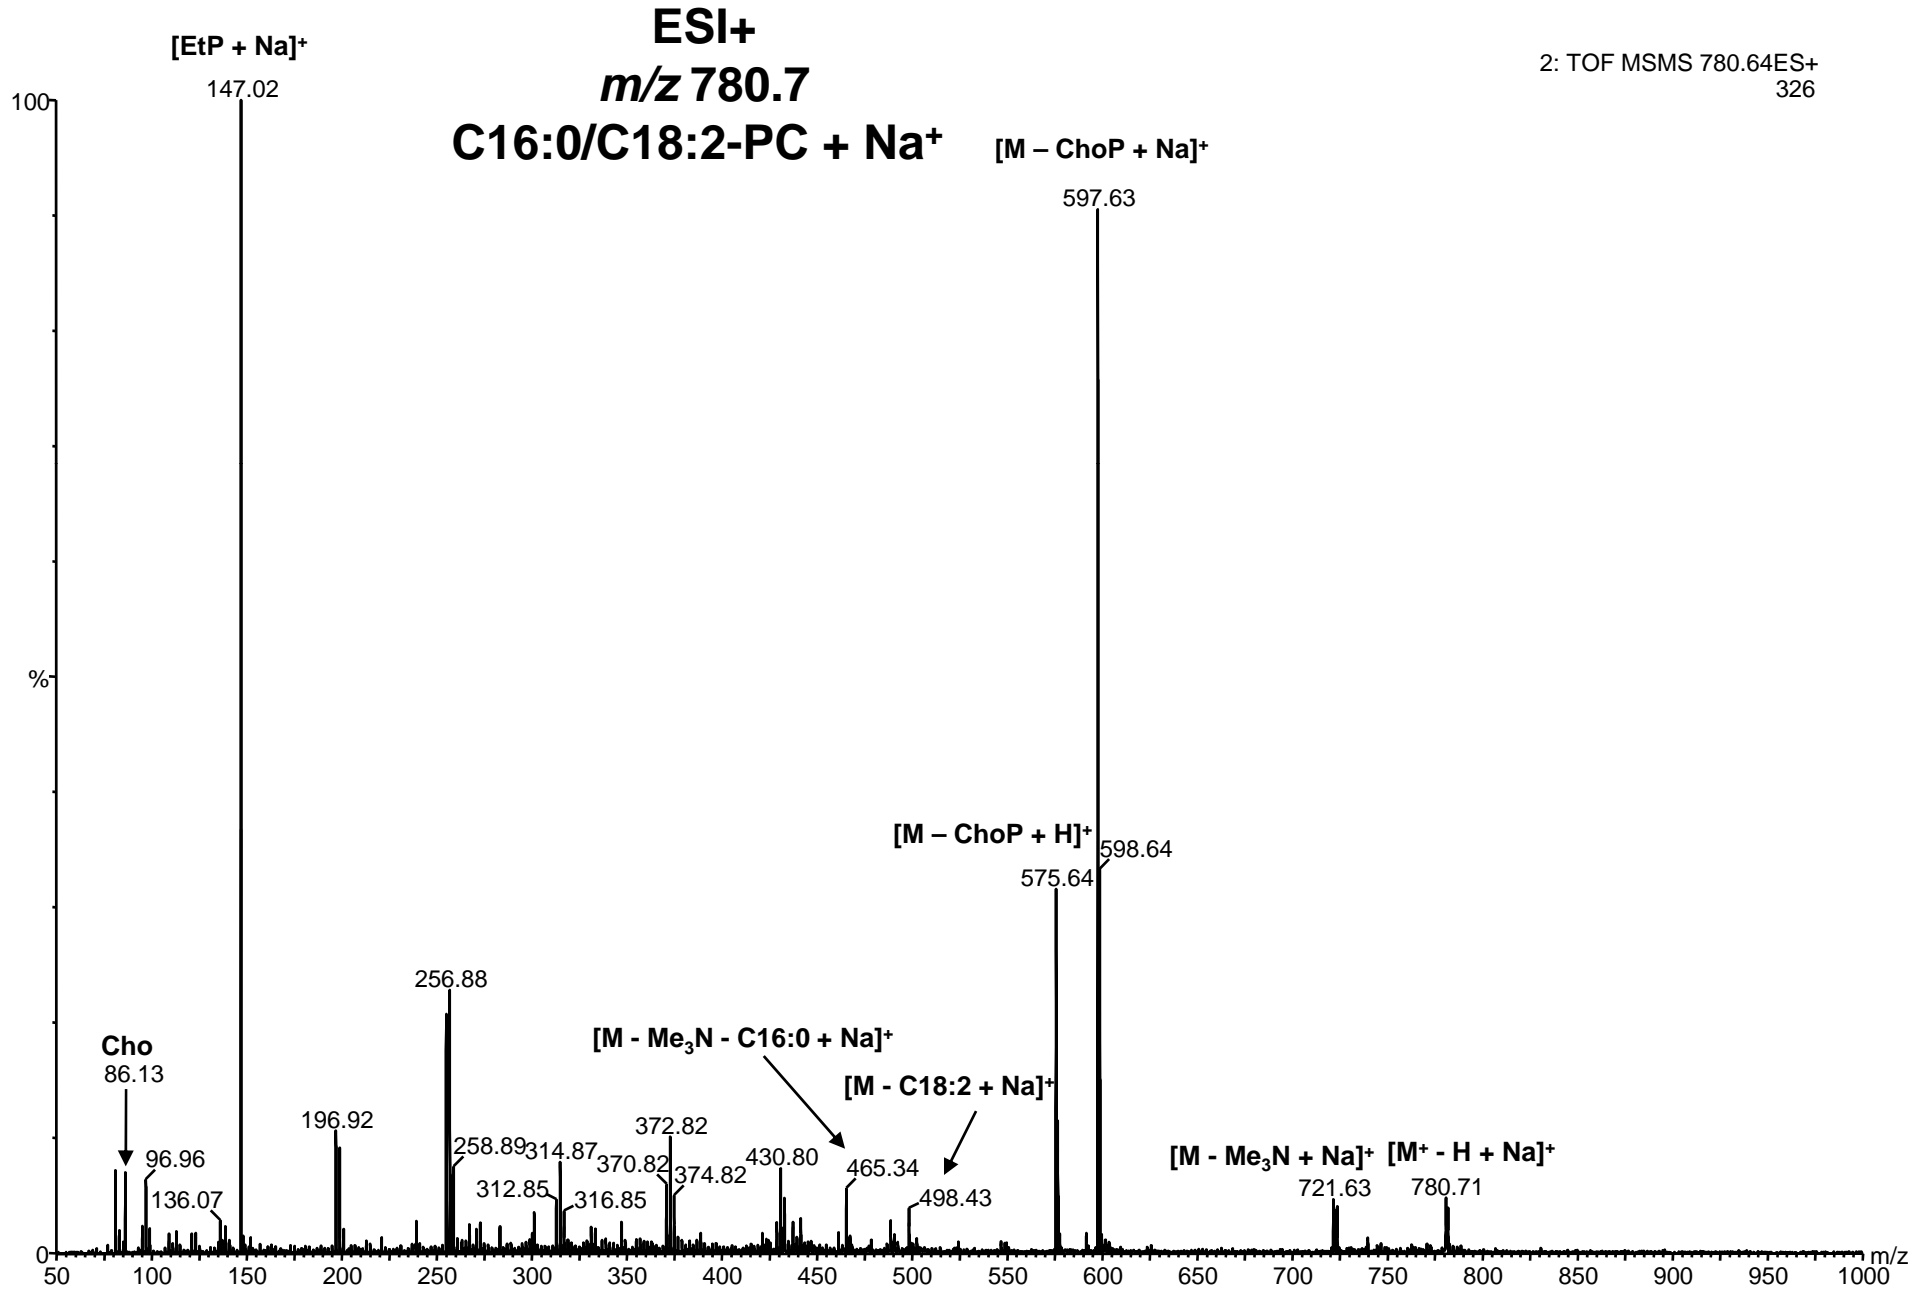

Supplemental Figure 1L

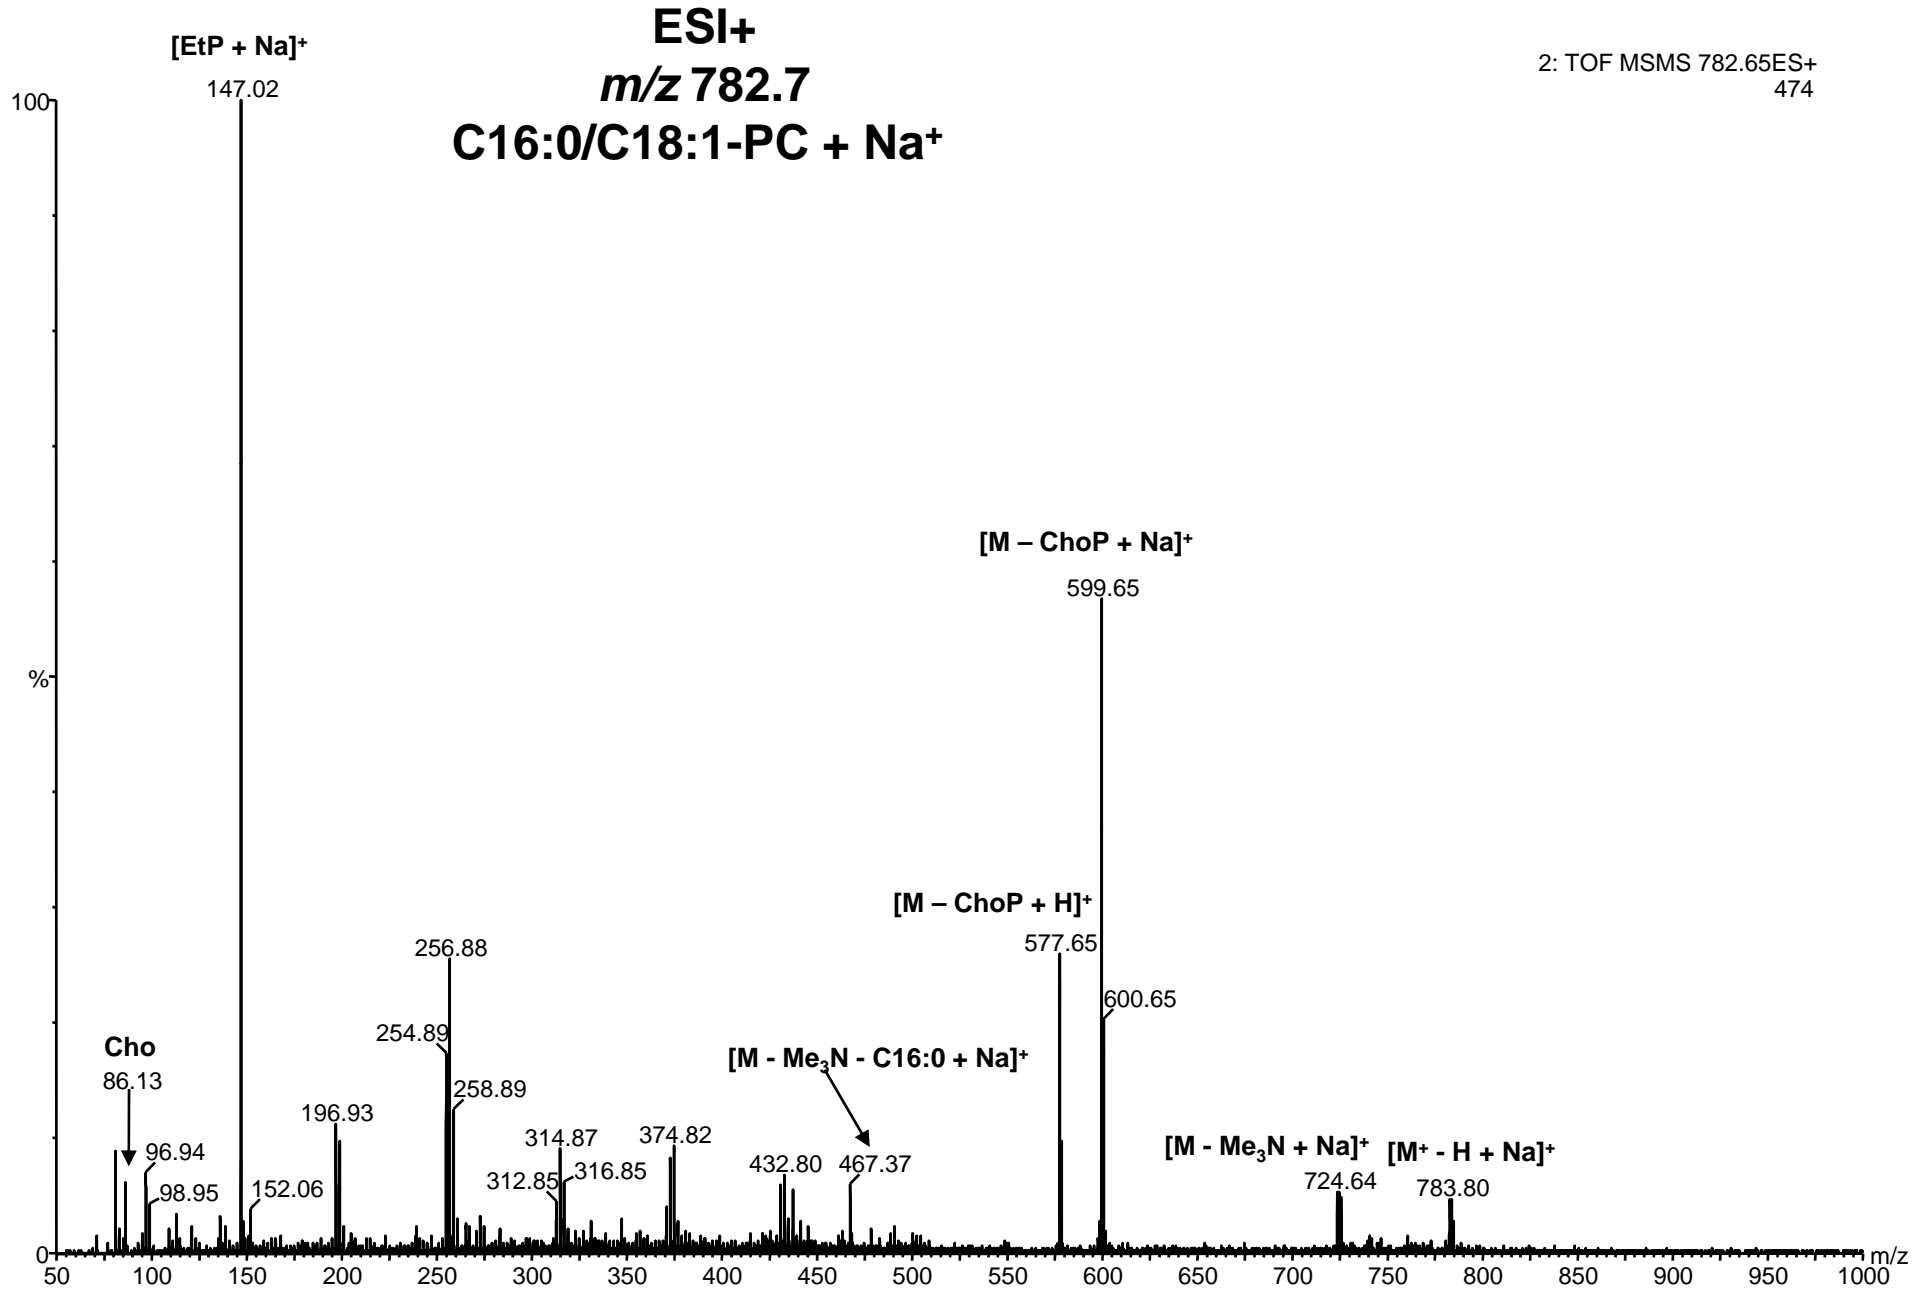

Supplemental Figure 1M

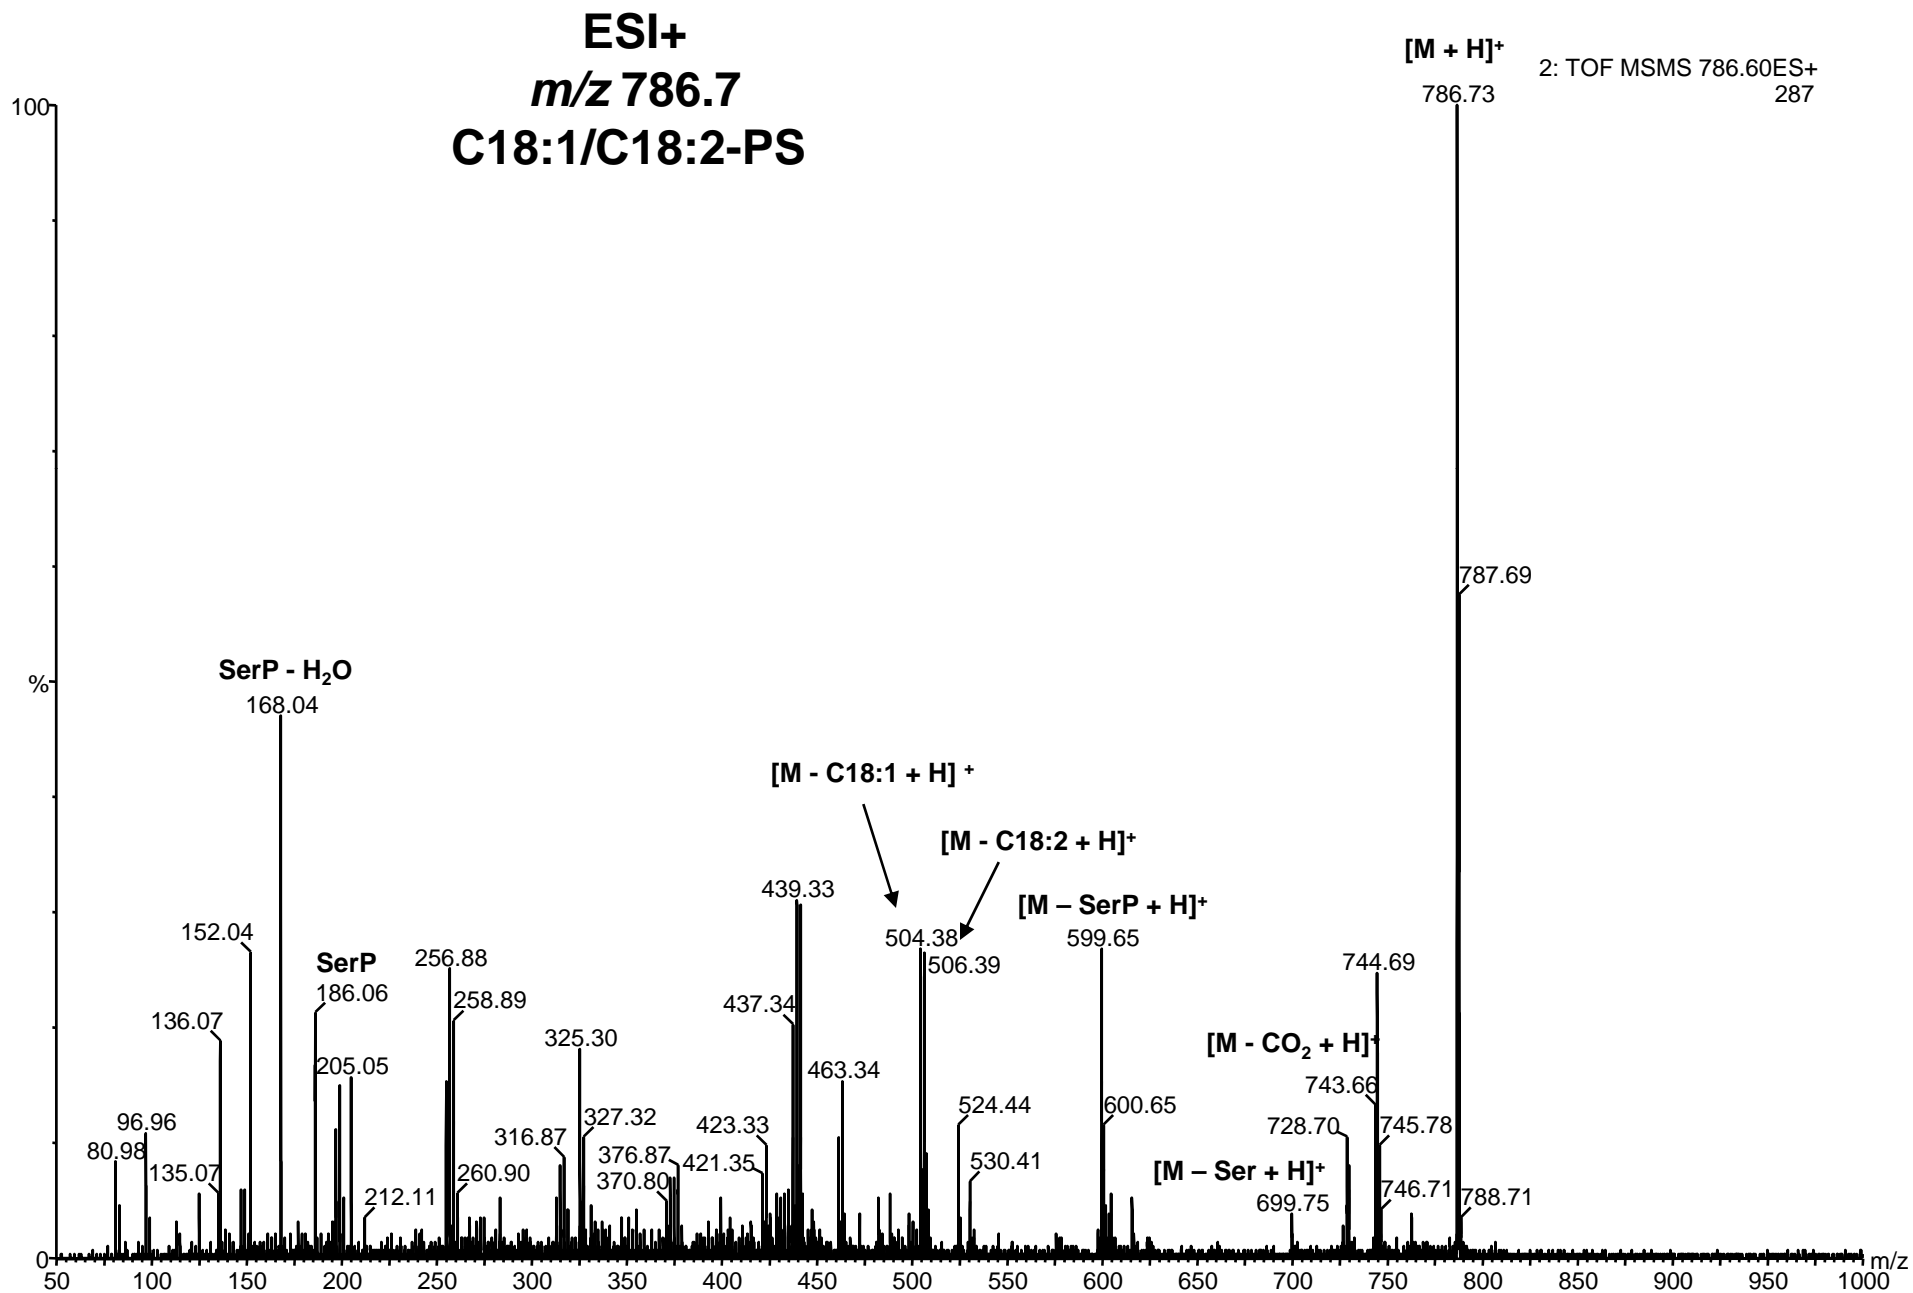

Supplemental Figure 1N

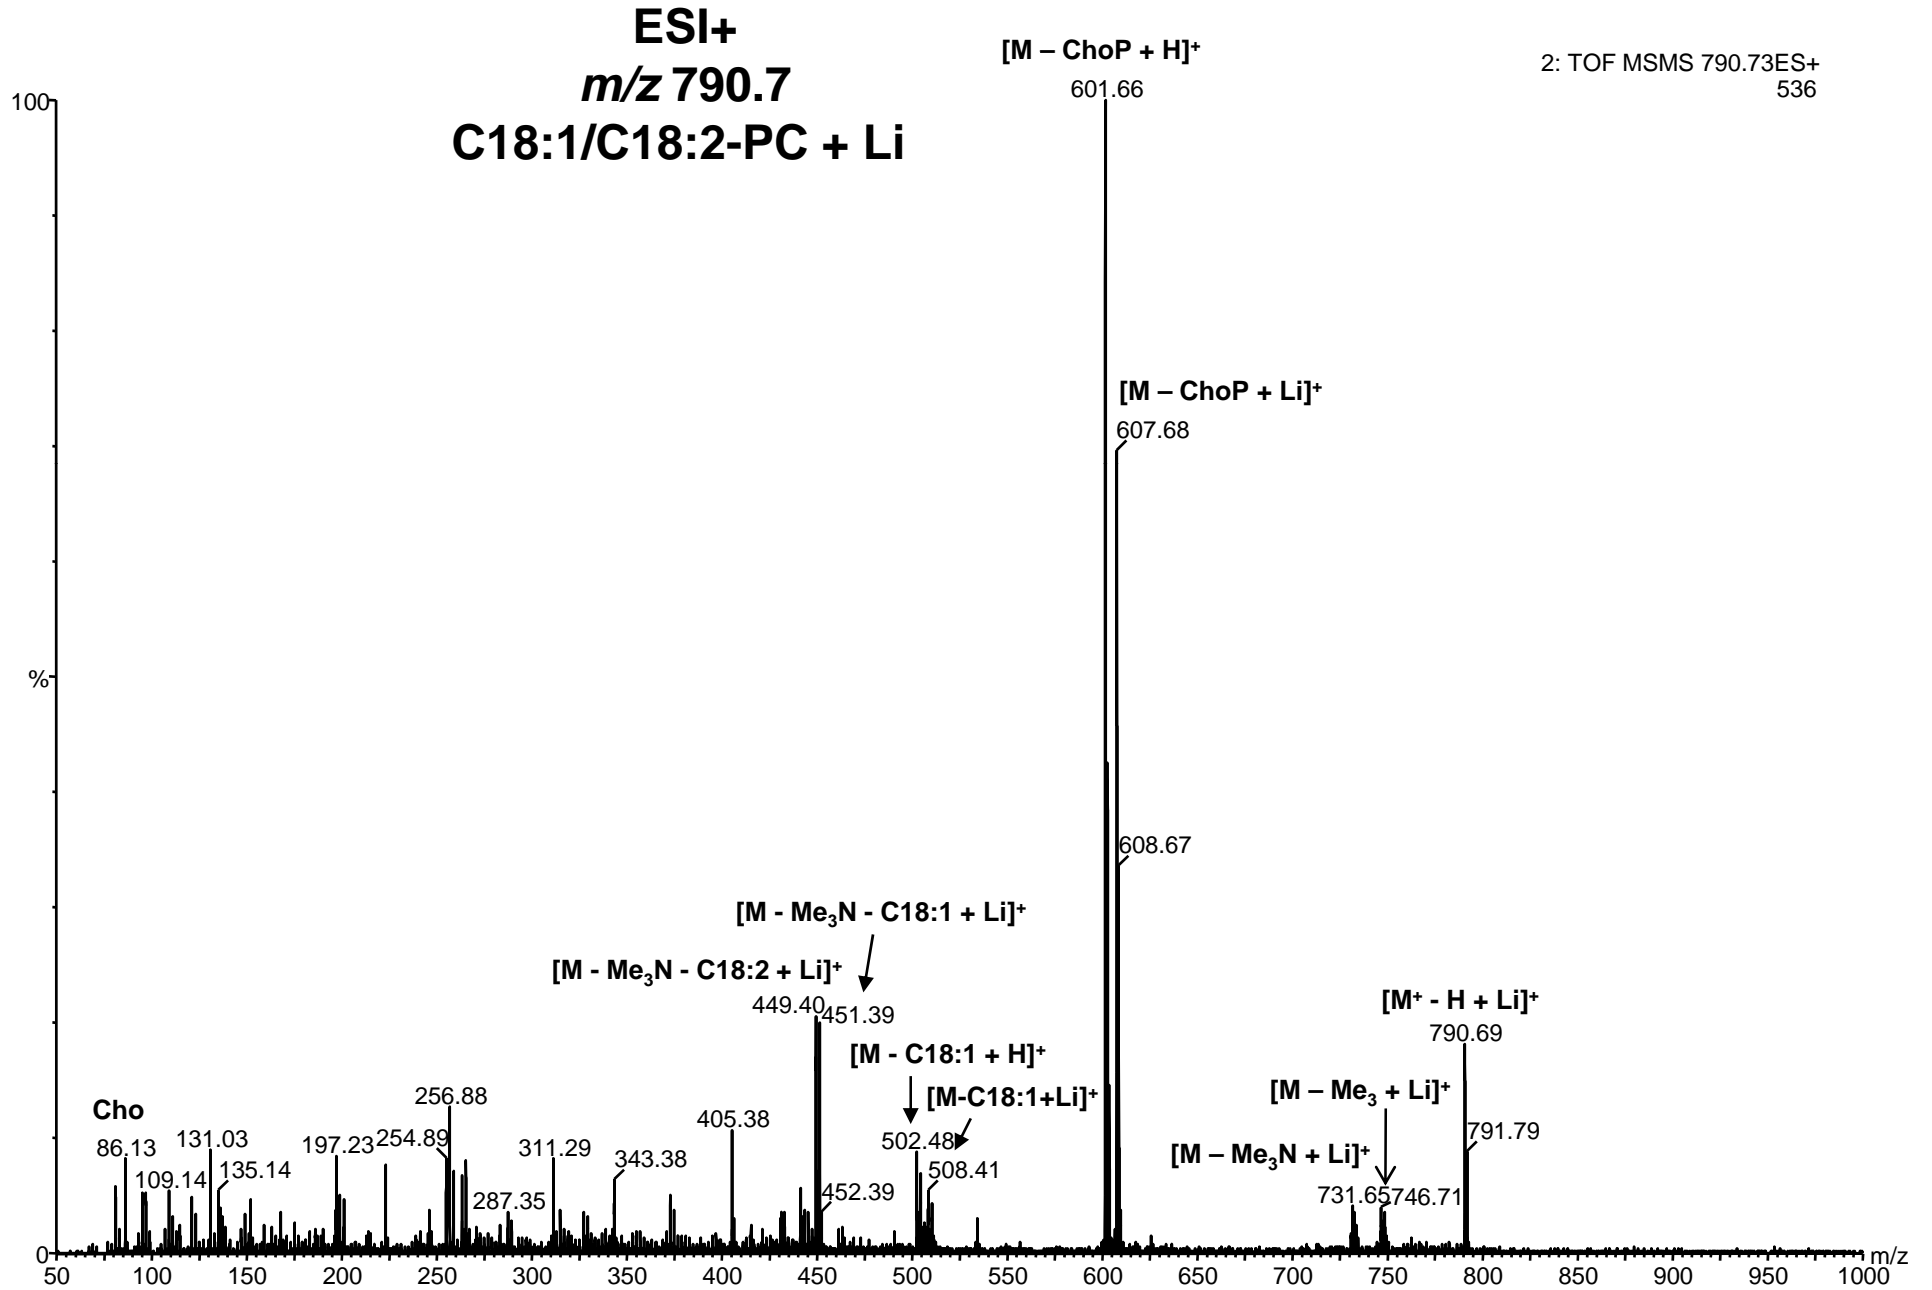

Supplemental Figure 1O

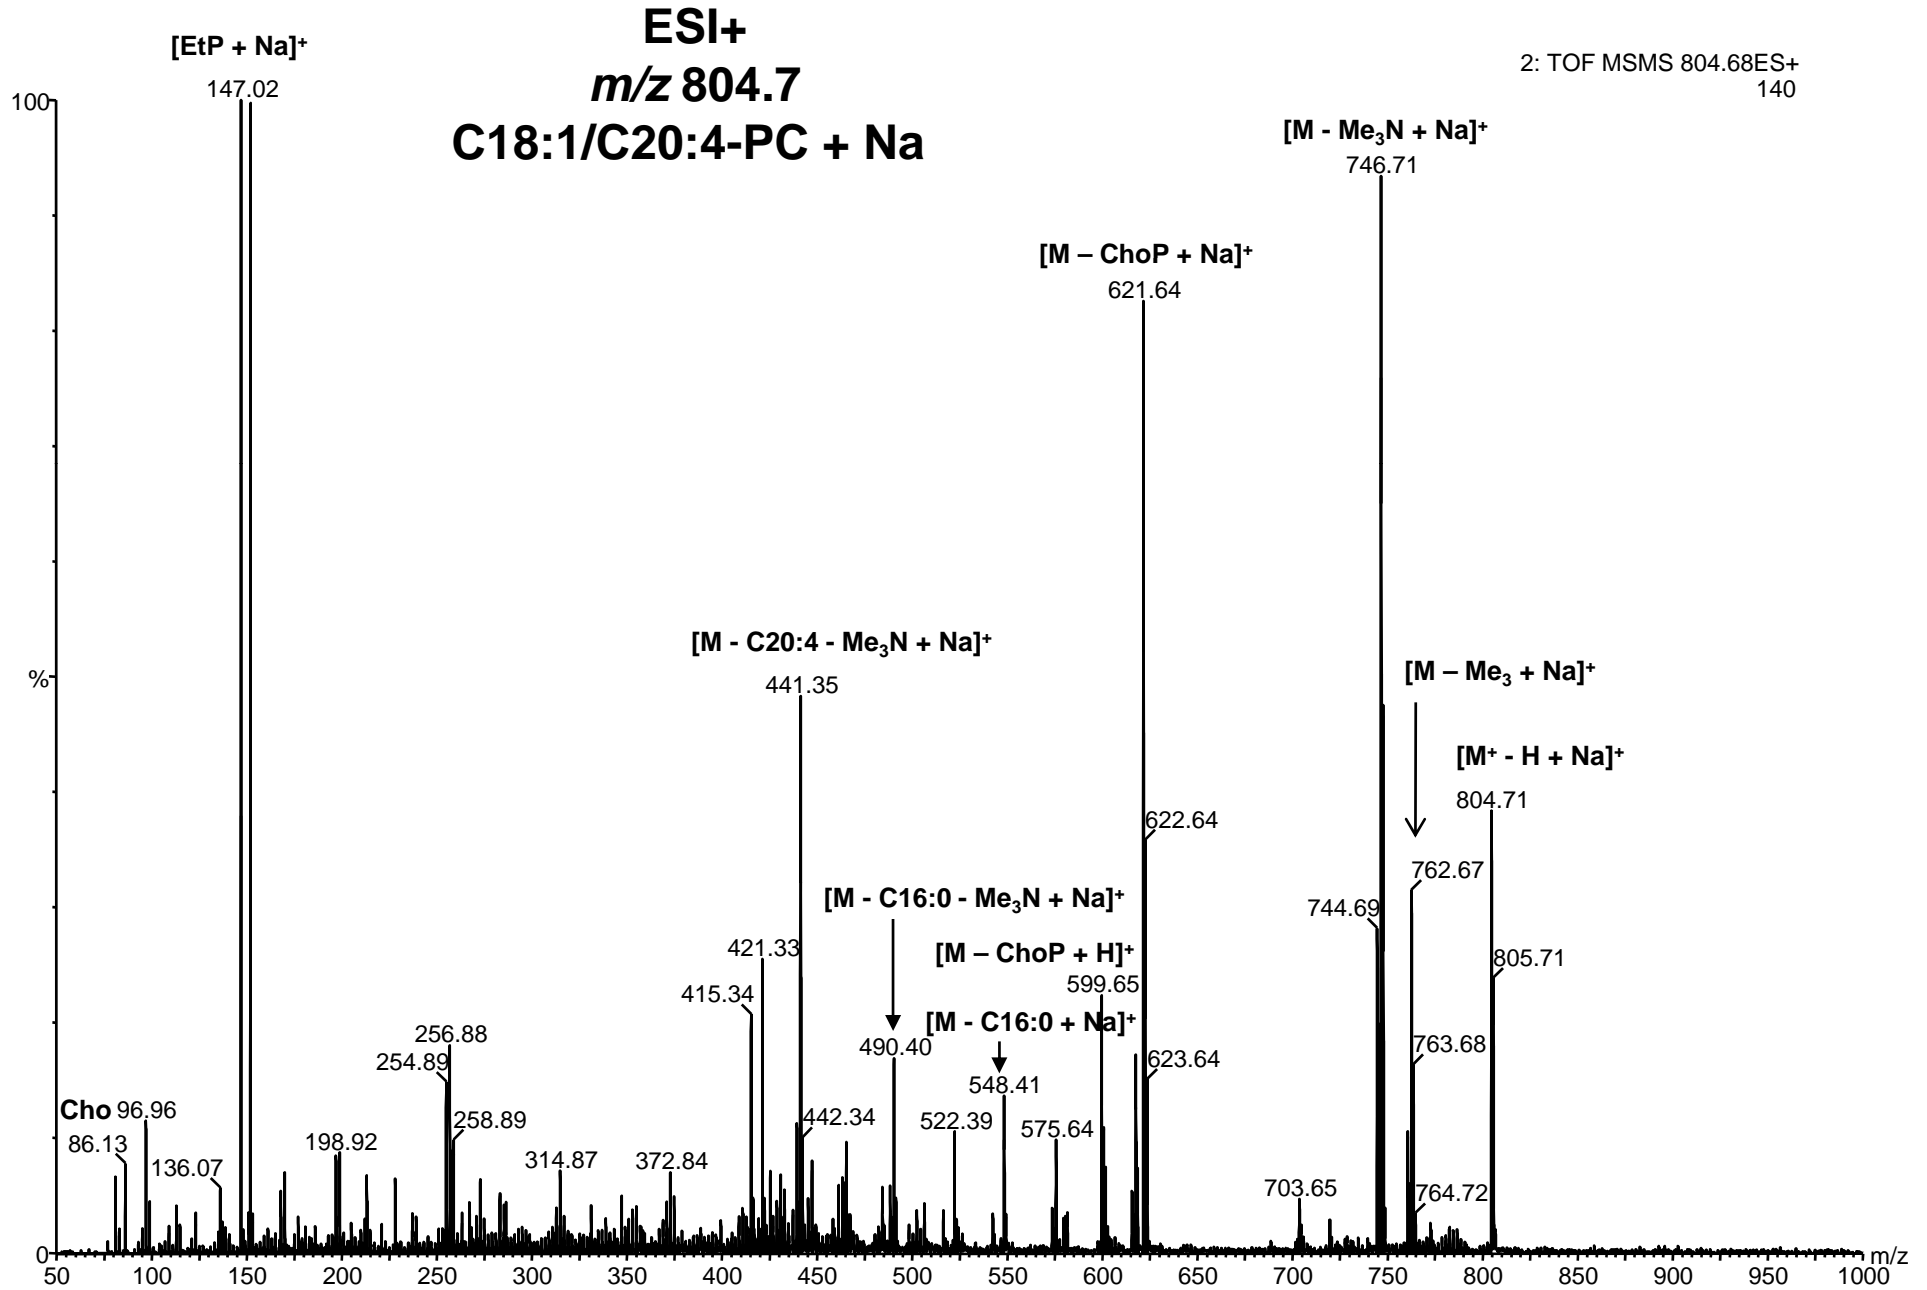



Supplemental Figure 1P

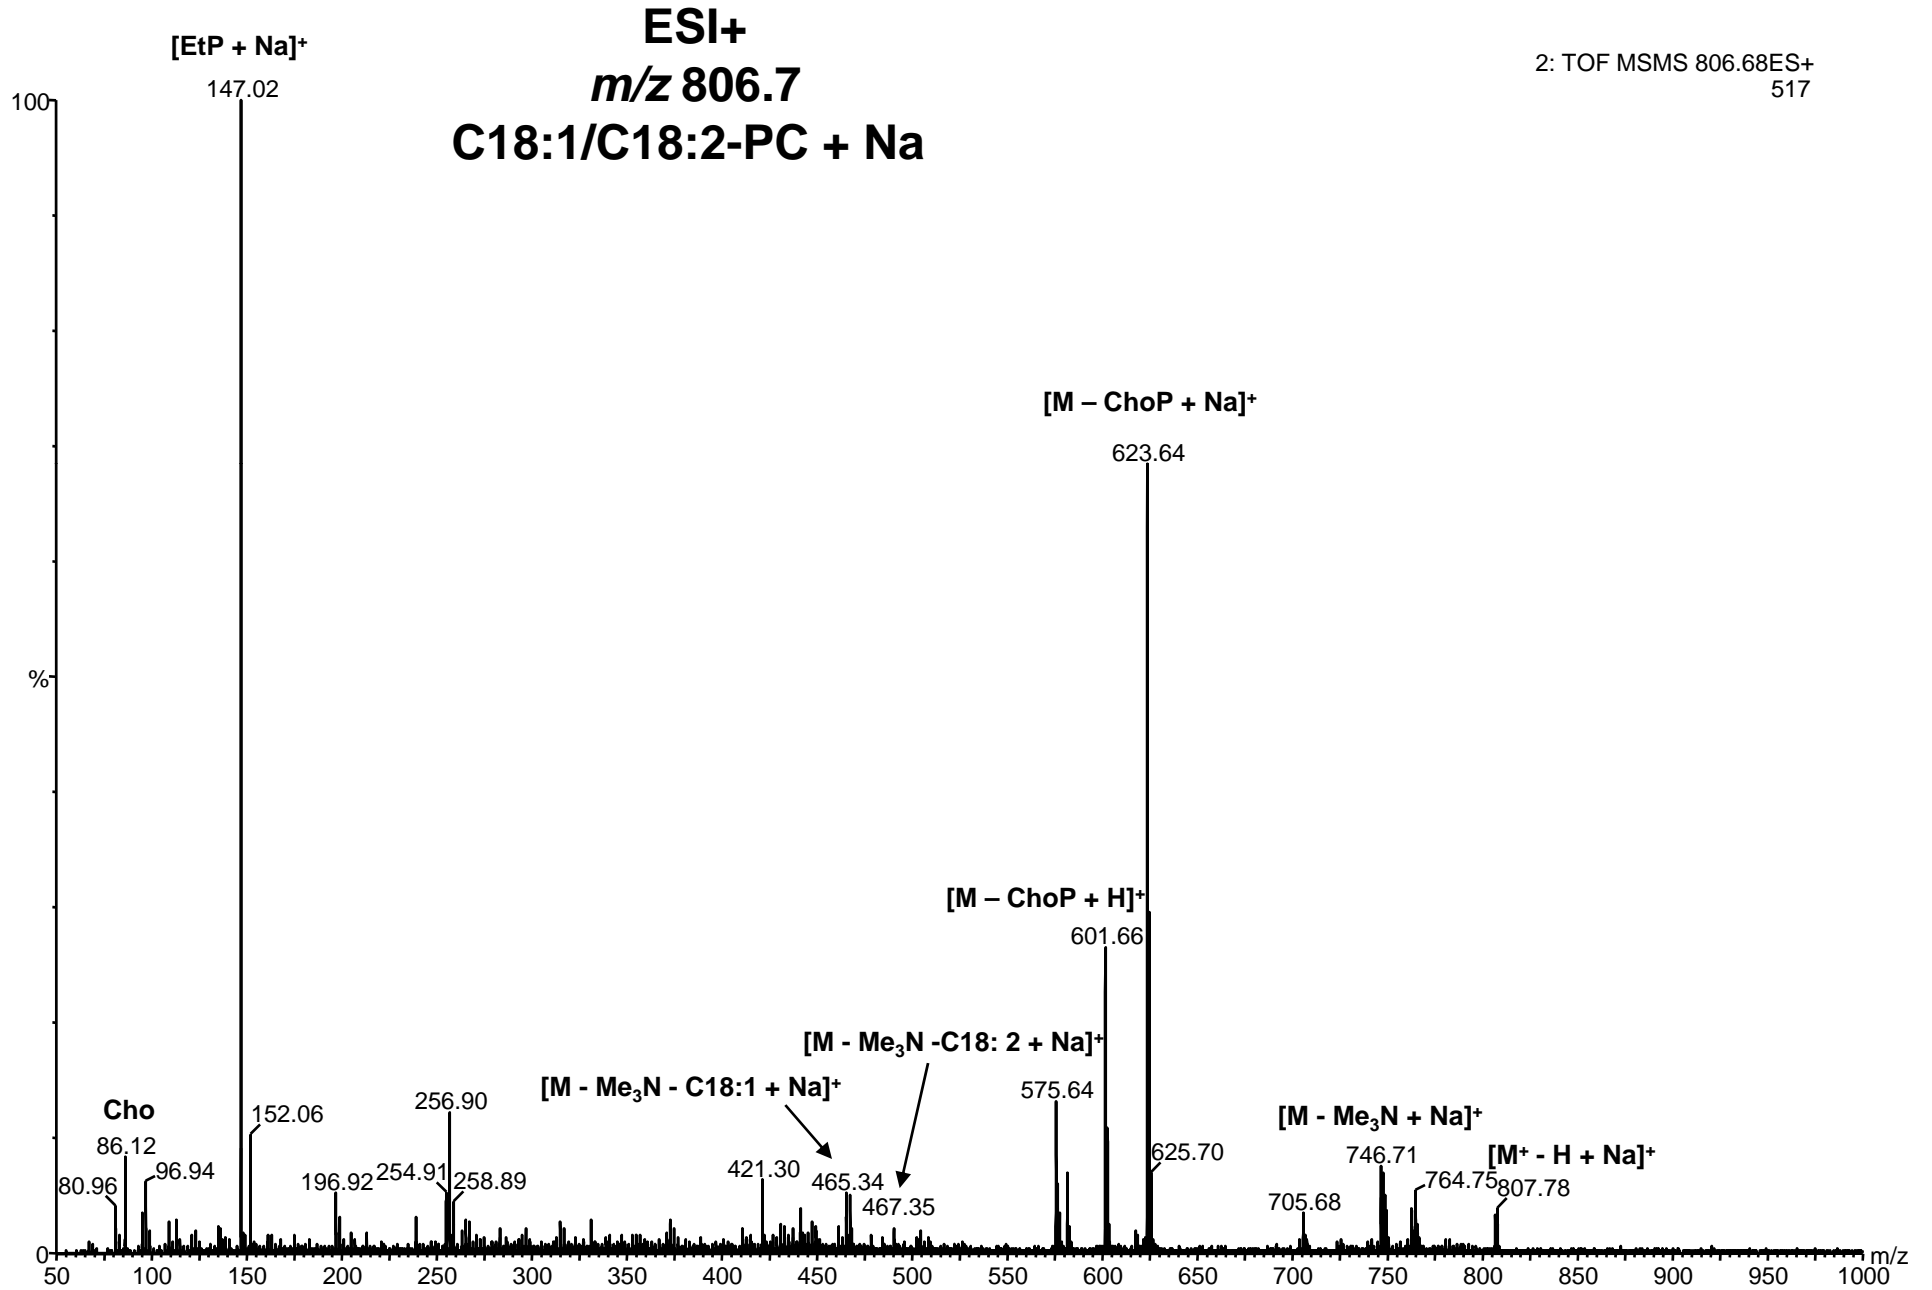

Supplemental Figure 1Q

**ESI+**  
***m/z* 808.7**  
**C18:1/C18:1-PC + Na**

2: TOF MSMS 808.75ES+  
541

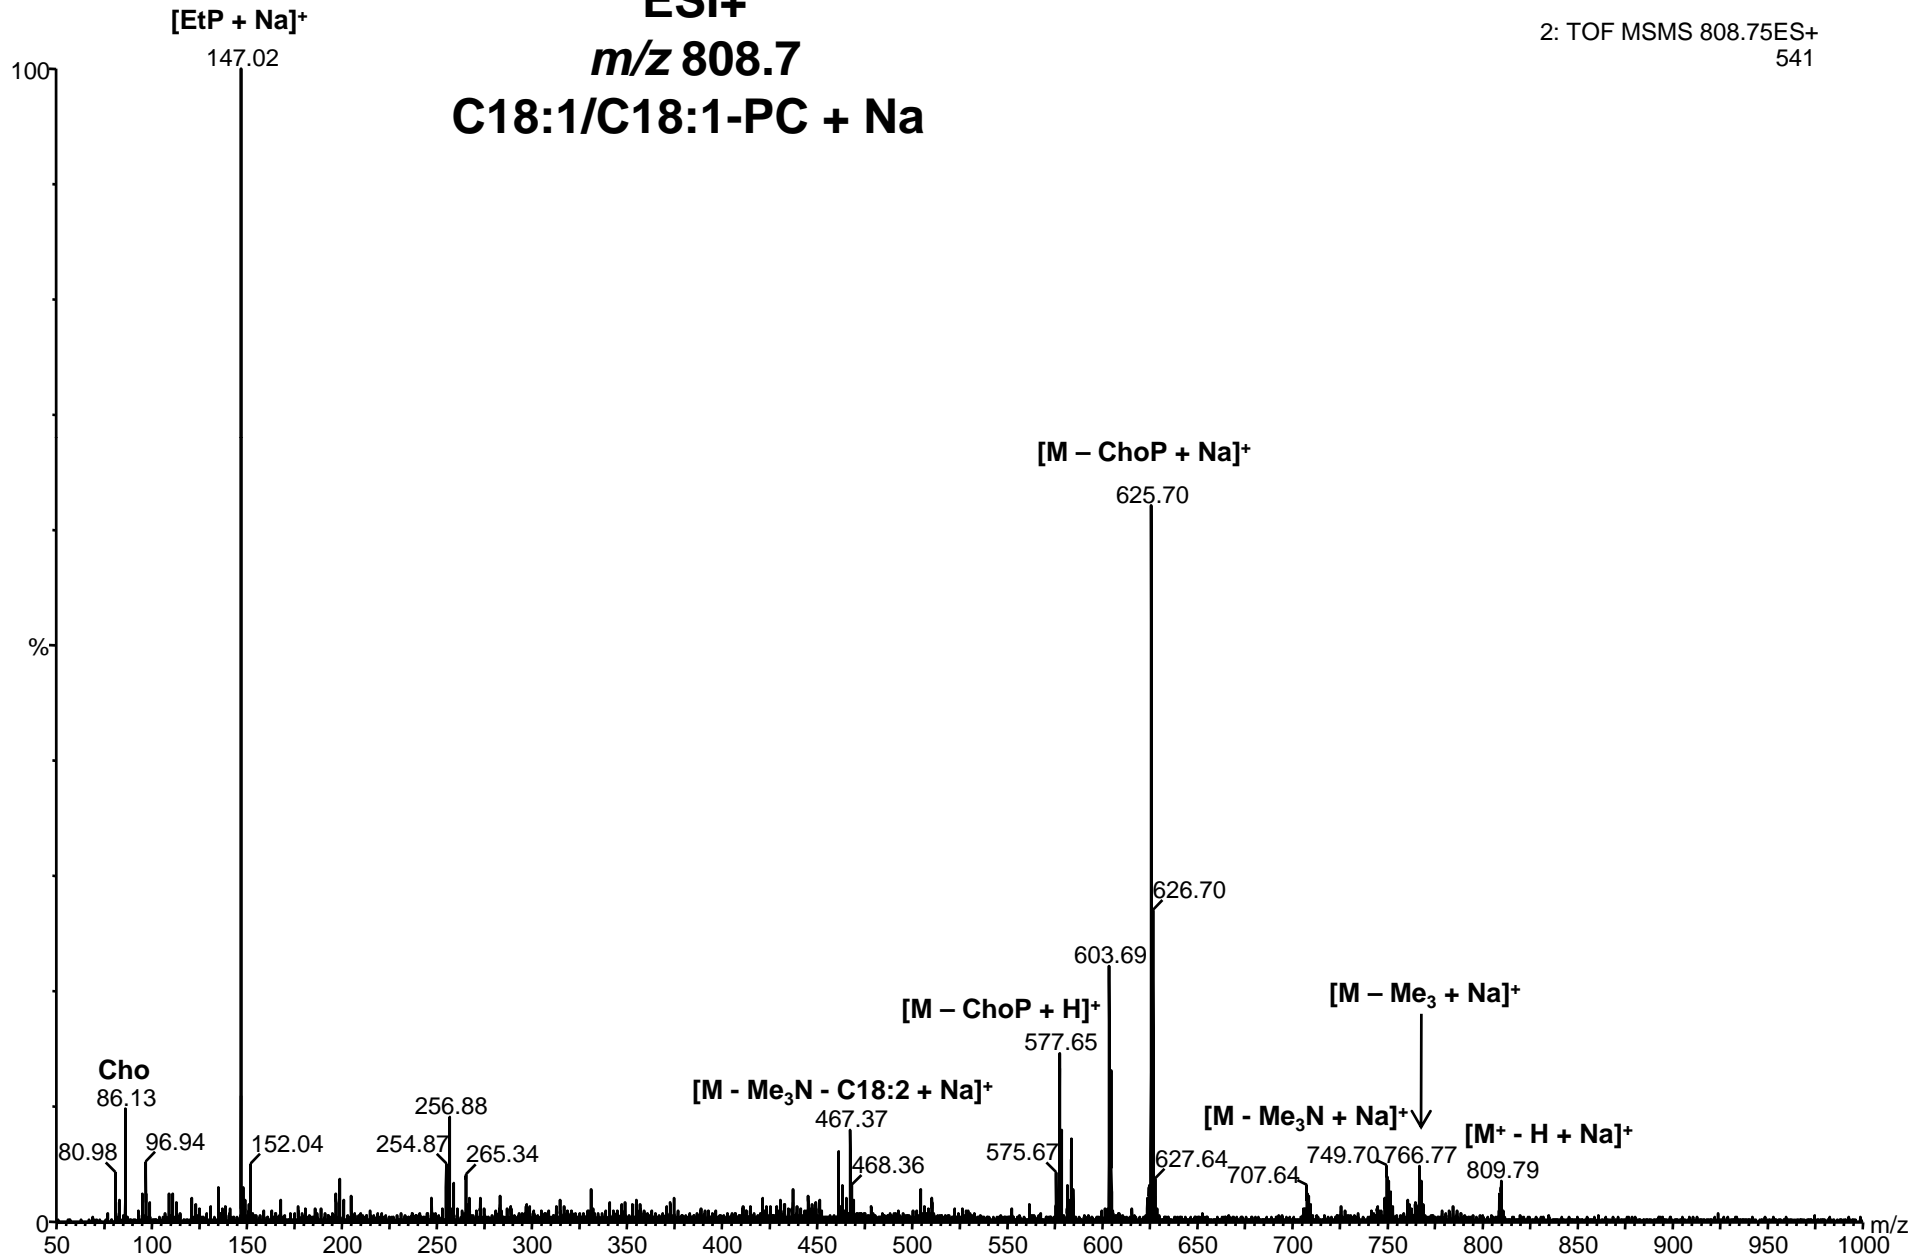

Supplement: NIHMS55458-supplement-Supp_Fig_1.pdf [file NIHMS55458-supplement-Supp_Fig_1.pdf]
